# Supplementary material for: Advancing diagnostics with BODIPY-bismuthene DNA biosensors
Source: Royal Society of Chemistry journal article supplement (doi:10.1039/d4nr05258g), 2025-01-01
Supplement: d4nr05258g1.xlsx [file d4nr05258g1.xlsx]

## Sheet: Fig2A
	Wavenumber	Absorbance
	nm	a.u.
	200	0.171
	201	0.169
	202	0.166
	203	0.161
	204	0.155
	205	0.147
	206	0.138
	207	0.129
	208	0.121
	209	0.115
	210	0.111
	211	0.107
	212	0.105
	213	0.103
	214	0.102
	215	0.1
	216	0.099
	217	0.099
	218	0.098
	219	0.097
	220	0.096
	221	0.095
	222	0.093
	223	0.092
	224	0.091
	225	0.09
	226	0.089
	227	0.088
	228	0.088
	229	0.087
	230	0.086
	231	0.085
	232	0.083
	233	0.081
	234	0.079
	235	0.078
	236	0.076
	237	0.075
	238	0.074
	239	0.073
	240	0.073
	241	0.072
	242	0.072
	243	0.072
	244	0.072
	245	0.072
	246	0.072
	247	0.072
	248	0.072
	249	0.073
	250	0.073
	251	0.072
	252	0.072
	253	0.072
	254	0.072
	255	0.072
	256	0.072
	257	0.072
	258	0.072
	259	0.072
	260	0.072
	261	0.073
	262	0.073
	263	0.073
	264	0.073
	265	0.074
	266	0.074
	267	0.073
	268	0.073
	269	0.073
	270	0.073
	271	0.072
	272	0.072
	273	0.071
	274	0.071
	275	0.07
	276	0.069
	277	0.069
	278	0.068
	279	0.067
	280	0.066
	281	0.065
	282	0.064
	283	0.063
	284	0.062
	285	0.061
	286	0.06
	287	0.059
	288	0.058
	289	0.057
	290	0.056
	291	0.055
	292	0.055
	293	0.054
	294	0.053
	295	0.052
	296	0.052
	297	0.052
	298	0.052
	299	0.052
	300	0.052
	301	0.052
	302	0.053
	303	0.053
	304	0.053
	305	0.054
	306	0.055
	307	0.055
	308	0.055
	309	0.055
	310	0.055
	311	0.055
	312	0.055
	313	0.054
	314	0.054
	315	0.054
	316	0.053
	317	0.053
	318	0.052
	319	0.052
	320	0.051
	321	0.051
	322	0.051
	323	0.051
	324	0.05
	325	0.05
	326	0.049
	327	0.049
	328	0.049
	329	0.049
	330	0.049
	331	0.049
	332	0.048
	333	0.048
	334	0.048
	335	0.048
	336	0.048
	337	0.048
	338	0.048
	339	0.048
	340	0.048
	341	0.048
	342	0.048
	343	0.048
	344	0.048
	345	0.048
	346	0.048
	347	0.048
	348	0.048
	349	0.048
	350	0.049
	351	0.049
	352	0.049
	353	0.049
	354	0.049
	355	0.049
	356	0.049
	357	0.048
	358	0.049
	359	0.048
	360	0.048
	361	0.048
	362	0.048
	363	0.047
	364	0.047
	365	0.047
	366	0.047
	367	0.046
	368	0.046
	369	0.045
	370	0.045
	371	0.045
	372	0.044
	373	0.044
	374	0.043
	375	0.042
	376	0.042
	377	0.042
	378	0.041
	379	0.04
	380	0.04
	381	0.039
	382	0.039
	383	0.038
	384	0.038
	385	0.037
	386	0.037
	387	0.036
	388	0.035
	389	0.035
	390	0.034
	391	0.034
	392	0.033
	393	0.032
	394	0.032
	395	0.031
	396	0.03
	397	0.03
	398	0.029
	399	0.029
	400	0.028
	401	0.027
	402	0.027
	403	0.026
	404	0.026
	405	0.025
	406	0.025
	407	0.024
	408	0.024
	409	0.024
	410	0.023
	411	0.023
	412	0.023
	413	0.023
	414	0.022
	415	0.022
	416	0.022
	417	0.022
	418	0.022
	419	0.022
	420	0.022
	421	0.022
	422	0.023
	423	0.023
	424	0.023
	425	0.023
	426	0.023
	427	0.024
	428	0.024
	429	0.024
	430	0.025
	431	0.025
	432	0.026
	433	0.026
	434	0.027
	435	0.027
	436	0.028
	437	0.028
	438	0.029
	439	0.03
	440	0.031
	441	0.031
	442	0.032
	443	0.033
	444	0.033
	445	0.034
	446	0.035
	447	0.036
	448	0.037
	449	0.038
	450	0.039
	451	0.04
	452	0.042
	453	0.043
	454	0.045
	455	0.047
	456	0.049
	457	0.051
	458	0.053
	459	0.056
	460	0.058
	461	0.062
	462	0.065
	463	0.068
	464	0.072
	465	0.076
	466	0.079
	467	0.083
	468	0.086
	469	0.089
	470	0.092
	471	0.094
	472	0.097
	473	0.098
	474	0.1
	475	0.102
	476	0.104
	477	0.106
	478	0.108
	479	0.111
	480	0.115
	481	0.119
	482	0.124
	483	0.129
	484	0.136
	485	0.143
	486	0.152
	487	0.161
	488	0.17
	489	0.182
	490	0.194
	491	0.208
	492	0.223
	493	0.239
	494	0.256
	495	0.274
	496	0.292
	497	0.309
	498	0.324
	499	0.337
	500	0.346
	501	0.351
	502	0.35
	503	0.344
	504	0.333
	505	0.318
	506	0.299
	507	0.278
	508	0.257
	509	0.234
	510	0.211
	511	0.19
	512	0.172
	513	0.154
	514	0.138
	515	0.125
	516	0.112
	517	0.102
	518	0.093
	519	0.085
	520	0.079
	521	0.073
	522	0.069
	523	0.064
	524	0.061
	525	0.058
	526	0.056
	527	0.054
	528	0.052
	529	0.05
	530	0.049
	531	0.047
	532	0.046
	533	0.045
	534	0.044
	535	0.043
	536	0.042
	537	0.041
	538	0.04
	539	0.039
	540	0.038
	541	0.037
	542	0.036
	543	0.036
	544	0.035
	545	0.034
	546	0.033
	547	0.032
	548	0.031
	549	0.03
	550	0.03
	551	0.029
	552	0.028
	553	0.027
	554	0.027
	555	0.026
	556	0.025
	557	0.025
	558	0.024
	559	0.023
	560	0.023
	561	0.022
	562	0.022
	563	0.021
	564	0.021
	565	0.02
	566	0.02
	567	0.019
	568	0.019
	569	0.018
	570	0.018
	571	0.018
	572	0.017
	573	0.017
	574	0.017
	575	0.016
	576	0.016
	577	0.016
	578	0.016
	579	0.015
	580	0.015
	581	0.015
	582	0.015
	583	0.015
	584	0.015
	585	0.014
	586	0.014
	587	0.014
	588	0.014
	589	0.014
	590	0.014
	591	0.014
	592	0.013
	593	0.013
	594	0.013
	595	0.013
	596	0.013
	597	0.013
	598	0.013
	599	0.013
	600	0.013
	601	0.013
	602	0.013
	603	0.013
	604	0.013
	605	0.013
	606	0.013
	607	0.013
	608	0.013
	609	0.013
	610	0.012
	611	0.012
	612	0.012
	613	0.012
	614	0.012
	615	0.012
	616	0.012
	617	0.012
	618	0.012
	619	0.012
	620	0.012
	621	0.012
	622	0.012
	623	0.012
	624	0.012
	625	0.012
	626	0.012
	627	0.012
	628	0.012
	629	0.012
	630	0.012
	631	0.012
	632	0.012
	633	0.012
	634	0.012
	635	0.012
	636	0.012
	637	0.012
	638	0.012
	639	0.012
	640	0.012
	641	0.012
	642	0.012
	643	0.012
	644	0.012
	645	0.012
	646	0.012
	647	0.012
	648	0.012
	649	0.012
	650	0.012
	651	0.012
	652	0.012
	653	0.012
	654	0.012
	655	0.012
	656	0.012
	657	0.012
	658	0.012
	659	0.012
	660	0.012
	661	0.012
	662	0.012
	663	0.011
	664	0.012
	665	0.012
	666	0.011
	667	0.011
	668	0.011
	669	0.012
	670	0.012
	671	0.011
	672	0.011
	673	0.011
	674	0.011
	675	0.011
	676	0.011
	677	0.011
	678	0.011
	679	0.011
	680	0.011
	681	0.011
	682	0.011
	683	0.011
	684	0.011
	685	0.011
	686	0.011
	687	0.011
	688	0.011
	689	0.011
	690	0.011
	691	0.011
	692	0.011
	693	0.011
	694	0.011
	695	0.011
	696	0.011
	697	0.011
	698	0.011
	699	0.011
	700	0.011
	701	0.011
	702	0.011
	703	0.011
	704	0.011
	705	0.011
	706	0.011
	707	0.011
	708	0.011
	709	0.011
	710	0.011
	711	0.01
	712	0.01
	713	0.01
	714	0.01
	715	0.01
	716	0.01
	717	0.01
	718	0.01
	719	0.01
	720	0.01
	721	0.01
	722	0.01
	723	0.01
	724	0.01
	725	0.01
	726	0.01
	727	0.01
	728	0.01
	729	0.01
	730	0.01
	731	0.01
	732	0.01
	733	0.01
	734	0.01
	735	0.01
	736	0.01
	737	0.01
	738	0.01
	739	0.01
	740	0.01
	741	0.01
	742	0.01
	743	0.01
	744	0.01
	745	0.01
	746	0.01
	747	0.01
	748	0.01
	749	0.01
	750	0.01
	751	0.01
	752	0.01
	753	0.01
	754	0.01
	755	0.01
	756	0.01
	757	0.01
	758	0.009
	759	0.009
	760	0.009
	761	0.009
	762	0.009
	763	0.009
	764	0.009
	765	0.009
	766	0.009
	767	0.009
	768	0.009
	769	0.009
	770	0.009
	771	0.009
	772	0.009
	773	0.009
	774	0.009
	775	0.009
	776	0.009
	777	0.009
	778	0.009
	779	0.009
	780	0.009
	781	0.009
	782	0.009
	783	0.009
	784	0.009
	785	0.008
	786	0.008
	787	0.009
	788	0.008
	789	0.008
	790	0.008
	791	0.008
	792	0.008
	793	0.008
	794	0.008
	795	0.008
	796	0.008
	797	0.008
	798	0.008
	799	0.008
	800	0.008

## Sheet: Fig 2B
	Wavenumber	Intensity
	nm	a.u.
	475	78767384
	476.06	66913007
	47695999	55975668
	478.03	45955365
	47892999	36852098
	480	28665869
	48104001	21396677
	481.94	15044521
	48298001	9609403
	48401999	5091321
	48507001	1490276
	485.97	-1193732
	48701001	-2960703
	48804999	-1105355
	48895001	2912211
	490	7198423
	491.06	10066857
	49195999	12457702
	493.03	14910378
	49392999	17439616
	495	20269959
	496.06	23062727
	49695999	2591754
	498.03	2860452
	49892999	3125586
	500	3369824
	50104001	35858879
	501.94	37698004
	50298001	39056809
	50401999	40053244
	50507001	40569163
	505.97	40643968
	50701001	40295532
	50804999	3961982
	50895001	38689185
	510	3758679
	511.06	3634322
	51195999	34932327
	51303003	3332129
	51392999	31793118
	515	30437311
	516.06	2896086
	51696002	27543893
	51803003	2620782
	51892999	25140193
	520	23996867
	52103998	23014121
	521.94	22055568
	52297998	21295847
	52402002	20516927
	52507001	19696362
	52596997	18984772
	52701001	18191733
	52804999	17525813
	52895001	16854912
	530	16169557
	53103998	15548114
	531.94	15002123
	53297998	14468088
	53402002	13945618
	53507001	1346157
	53596997	12968105
	53701001	12400823
	53804999	11947842
	53895001	11518605
	540	11007634
	54103998	10569823
	541.94	10161272
	54297998	9770589
	54402002	9326532
	54507001	8871398
	54596997	8424427
	54701001	7998946
	54804999	7569205
	54895001	7131226
	550	6812551
	55103998	6427024
	551.94	6134979
	55297998	5808799
	55402002	5462839
	55507001	5162899
	55596997	4897719
	55701001	4654742
	55804999	4420456
	55895001	4223218
	560	4029376
	56102002	3809472
	56204999	3648145
	562.94	3477118
	56396997	3315739
	565	317681
	56602002	301131
	56704999	285329
	567.94	2695676
	56896997	2555345
	570	2439397
	57103998	2341394
	571.94	2214235
	57297998	2109355
	57402002	1999426
	57507001	1892895
	57596997	1819212
	57701001	1732478
	57804999	1654296
	57895001	158313
	580	1519057
	58102002	1481936
	58204999	1433487
	582.94	1365687
	58396997	1324844
	585	1276607
	58602002	12258
	58704999	1173477
	587.94	1131208
	58896997	1081808
	590	1033192
	59102002	985361
	59204999	938314
	592.94	892053
	59396997	846576
	595	801885
	59602002	757978
	59704999	714856
	597.94	672518
	59896997	630966
	600	590198

## Sheet: Fig 2C
	E / V	i /uA
	-1.15	-313
	-1149	-299.6
	-1148	-289.6
	-1147	-281
	-1146	-273.7
	-1145	-267.1
	-1144	-260.8
	-1143	-254.9
	-1142	-249.3
	-1.14	-244
	-1139	-239
	-1138	-234.3
	-1137	-229.5
	-1136	-224.6
	-1135	-220.5
	-1134	-216.7
	-1133	-212.8
	-1132	-209
	-1131	-205.3
	-1.13	-201.8
	-1129	-198.3
	-1128	-194.9
	-1127	-191.6
	-1125	-188.4
	-1124	-185.3
	-1123	-182.3
	-1122	-179.5
	-1121	-176.5
	-1.12	-173.7
	-1119	-170.9
	-1118	-168.3
	-1117	-165.7
	-1116	-163.3
	-1115	-160.8
	-1114	-158.4
	-1113	-156
	-1112	-153.7
	-1111	-151.5
	-1109	-149.3
	-1108	-147.2
	-1107	-145
	-1106	-143
	-1105	-140.9
	-1104	-139.2
	-1103	-137.1
	-1102	-135.3
	-1101	-133.5
	-1.1	-131.8
	-1099	-130
	-1098	-128.4
	-1097	-126.6
	-1096	-125
	-1095	-123.4
	-1093	-121.8
	-1092	-120.4
	-1091	-118.8
	-1.09	-117.5
	-1089	-115.9
	-1088	-114.5
	-1087	-113
	-1086	-111.7
	-1085	-110.3
	-1084	-109.1
	-1083	-107.8
	-1082	-106.6
	-1081	-105.3
	-1.08	-104
	-1078	-102.8
	-1077	-101.6
	-1076	-100.6
	-1075	-99.33
	-1074	-98.39
	-1073	-97.2
	-1072	-96.19
	-1071	-94.97
	-1.07	-94.06
	-1069	-92.96
	-1068	-92.07
	-1067	-91.25
	-1066	-90.33
	-1065	-89.42
	-1064	-88.47
	-1062	-87.62
	-1061	-86.67
	-1.06	-85.88
	-1059	-84.93
	-1058	-84.14
	-1057	-83.16
	-1056	-82.37
	-1055	-81.51
	-1054	-80.81
	-1053	-79.99
	-1052	-79.25
	-1051	-78.43
	-1.05	-77.73
	-1049	-77
	-1048	-76.29
	-1046	-75.71
	-1045	-74.98
	-1044	-74.4
	-1043	-73.61
	-1042	-73
	-1041	-72.2
	-1.04	-71.62
	-1039	-70.86
	-1038	-70.31
	-1037	-69.61
	-1036	-69.06
	-1035	-68.39
	-1034	-67.81
	-1033	-67.26
	-1031	-66.68
	-1.03	-66.22
	-1029	-65.64
	-1028	-65.16
	-1027	-64.54
	-1026	-64.21
	-1025	-63.57
	-1024	-63.14
	-1023	-62.53
	-1022	-62.16
	-1021	-61.61
	-1.02	-61.19
	-1019	-60.67
	-1018	-60.12
	-1017	-59.6
	-1015	-59.14
	-1014	-58.78
	-1013	-58.2
	-1012	-57.77
	-1011	-57.19
	-1.01	-56.92
	-1009	-56.58
	-1008	-56.34
	-1007	-55.91
	-1006	-55.57
	-1005	-54.93
	-1004	-54.63
	-1003	-54.26
	-1002	-53.92
	-1001	-53.5
	-0.9995	-53.1
	-0.9984	-52.76
	-0.9973	-52.31
	-0.9962	-52.03
	-0.9952	-51.51
	-0.9941	-51.3
	-0.993	-50.84
	-0.992	-50.57
	-0.9909	-50.14
	-0.9898	-49.32
	-0.9888	-48.55
	-0.9877	-48.13
	-0.9866	-47.76
	-0.9856	-47.39
	-0.9845	-47.63
	-0.9834	-47.6
	-0.9824	-47.9
	-0.9813	-48.04
	-0.9802	-48.07
	-0.9792	-47.78
	-0.9781	-47.62
	-0.977	-47.23
	-0.976	-47.04
	-0.9749	-46.62
	-0.9738	-46.4
	-0.9727	-45.96
	-0.9717	-45.61
	-0.9706	-45.32
	-0.9695	-45.12
	-0.9685	-44.9
	-0.9674	-44.64
	-0.9663	-44.46
	-0.9653	-44.16
	-0.9642	-43.96
	-0.9631	-43.62
	-0.9621	-43.44
	-0.961	-43.01
	-0.9599	-42.89
	-0.9589	-42.54
	-0.9578	-42.37
	-0.9567	-42.1
	-0.9557	-41.86
	-0.9546	-41.62
	-0.9535	-41.42
	-0.9525	-41.23
	-0.9514	-40.97
	-0.9503	-40.79
	-0.9492	-40.48
	-0.9482	-40.34
	-0.9471	-40.08
	-0.946	-39.97
	-0.945	-39.65
	-0.9439	-39.51
	-0.9428	-39.18
	-0.9418	-39.1
	-0.9407	-38.87
	-0.9396	-38.64
	-0.9386	-38.43
	-0.9375	-38.13
	-0.9364	-37.98
	-0.9354	-37.76
	-0.9343	-37.64
	-0.9332	-37.45
	-0.9322	-37.33
	-0.9311	-37.03
	-0.93	-36.95
	-0.929	-36.68
	-0.9279	-36.63
	-0.9268	-36.4
	-0.9258	-36.31
	-0.9247	-36.07
	-0.9236	-35.94
	-0.9225	-35.73
	-0.9215	-35.58
	-0.9204	-35.43
	-0.9193	-35.28
	-0.9183	-35.18
	-0.9172	-34.91
	-0.9161	-34.82
	-0.9151	-34.48
	-0.914	-34.5
	-0.9129	-34.23
	-0.9119	-34.18
	-0.9108	-33.9
	-0.9097	-33.78
	-0.9087	-33.6
	-0.9076	-33.47
	-0.9065	-33.32
	-0.9055	-33.15
	-0.9044	-33.06
	-0.9033	-32.83
	-0.9023	-32.72
	-0.9012	-32.51
	-0.9001	-32.45
	-0.899	-32.24
	-0.898	-32.21
	-0.8969	-31.96
	-0.8958	-31.86
	-0.8948	-31.63
	-0.8937	-31.37
	-0.8926	-31.3
	-0.8916	-31.27
	-0.8905	-31.13
	-0.8894	-30.91
	-0.8884	-30.84
	-0.8873	-30.68
	-0.8862	-30.6
	-0.8852	-30.37
	-0.8841	-30.36
	-0.883	-30.09
	-0.882	-30.1
	-0.8809	-29.85
	-0.8798	-29.84
	-0.8788	-29.6
	-0.8777	-29.57
	-0.8766	-29.35
	-0.8755	-29.25
	-0.8745	-29.1
	-0.8734	-28.95
	-0.8723	-28.78
	-0.8713	-28.63
	-0.8702	-28.63
	-0.8691	-28.42
	-0.8681	-28.38
	-0.867	-28.15
	-0.8659	-28.13
	-0.8649	-27.9
	-0.8638	-27.86
	-0.8627	-27.57
	-0.8617	-27.53
	-0.8606	-27.4
	-0.8595	-27.28
	-0.8585	-27.14
	-0.8574	-26.97
	-0.8563	-26.89
	-0.8553	-26.69
	-0.8542	-26.65
	-0.8531	-26.42
	-0.8521	-26.42
	-0.851	-26.18
	-0.8499	-26.16
	-0.8488	-25.93
	-0.8478	-25.91
	-0.8467	-25.67
	-0.8456	-25.6
	-0.8446	-25.43
	-0.8435	-25.31
	-0.8424	-25.2
	-0.8414	-25.09
	-0.8403	-25.01
	-0.8392	-24.82
	-0.8382	-24.77
	-0.8371	-24.52
	-0.836	-24.51
	-0.835	-24.25
	-0.8339	-24.22
	-0.8328	-23.99
	-0.8318	-23.95
	-0.8307	-23.76
	-0.8296	-23.7
	-0.8286	-23.53
	-0.8275	-23.4
	-0.8264	-23.25
	-0.8253	-23.06
	-0.8243	-22.97
	-0.8232	-22.71
	-0.8221	-22.68
	-0.8211	-22.46
	-0.82	-22.45
	-0.8189	-22.2
	-0.8179	-22.26
	-0.8168	-22.03
	-0.8157	-22.05
	-0.8147	-21.86
	-0.8136	-21.78
	-0.8125	-21.62
	-0.8115	-21.51
	-0.8104	-21.4
	-0.8093	-21.2
	-0.8083	-21.14
	-0.8072	-20.95
	-0.8061	-20.96
	-0.8051	-20.72
	-0.804	-20.7
	-0.8029	-20.49
	-0.8018	-20.5
	-0.8008	-20.28
	-0.7997	-20.25
	-0.7986	-20.02
	-0.7976	-19.93
	-0.7965	-19.48
	-0.7954	-19.6
	-0.7944	-19.51
	-0.7933	-19.42
	-0.7922	-19.47
	-0.7912	-19.36
	-0.7901	-19.36
	-0.789	-19.19
	-0.788	-19.23
	-0.7869	-18.91
	-0.7858	-18.96
	-0.7848	-18.82
	-0.7837	-18.75
	-0.7826	-18.53
	-0.7816	-18.62
	-0.7805	-18.47
	-0.7794	-18.37
	-0.7784	-18.3
	-0.7773	-18.17
	-0.7762	-18.23
	-0.7751	-18.09
	-0.7741	-18.08
	-0.773	-17.95
	-0.7719	-17.97
	-0.7709	-17.78
	-0.7698	-17.83
	-0.7687	-17.7
	-0.7677	-17.72
	-0.7666	-17.61
	-0.7655	-17.59
	-0.7645	-17.49
	-0.7634	-17.43
	-0.7623	-17.35
	-0.7613	-17.24
	-0.7602	-17.25
	-0.7591	-17.08
	-0.7581	-17.16
	-0.757	-16.99
	-0.7559	-17.03
	-0.7549	-16.87
	-0.7538	-16.89
	-0.7527	-16.72
	-0.7516	-16.78
	-0.7506	-16.62
	-0.7495	-16.6
	-0.7484	-16.49
	-0.7474	-16.45
	-0.7463	-16.36
	-0.7452	-16.17
	-0.7442	-16.2
	-0.7431	-16.09
	-0.742	-16.17
	-0.741	-15.95
	-0.7399	-15.96
	-0.7388	-15.7
	-0.7378	-15.77
	-0.7367	-15.58
	-0.7356	-15.59
	-0.7346	-15.42
	-0.7335	-15.33
	-0.7324	-15.26
	-0.7314	-15.14
	-0.7303	-15.08
	-0.7292	-14.9
	-0.7281	-14.87
	-0.7271	-14.68
	-0.726	-14.63
	-0.7249	-14.45
	-0.7239	-14.41
	-0.7228	-14.22
	-0.7217	-14.18
	-0.7207	-13.99
	-0.7196	-13.93
	-0.7185	-13.77
	-0.7175	-13.62
	-0.7164	-13.45
	-0.7153	-13.27
	-0.7143	-13.18
	-0.7132	-13
	-0.7121	-12.9
	-0.7111	-12.63
	-0.71	-12.58
	-0.7089	-12.28
	-0.7079	-12.25
	-0.7068	-11.92
	-0.7057	-11.86
	-0.7047	-11.54
	-0.7036	-11.43
	-0.7025	-11.17
	-0.7014	-11
	-0.7004	-10.79
	-0.6993	-10.53
	-0.6982	-10.28
	-0.6972	-10.05
	-0.6961	-9.94
	-0.695	-9644
	-0.694	-9497
	-0.6929	-9146
	-0.6918	-9021
	-0.6908	-8618
	-0.6897	-8.49
	-0.6886	-8121
	-0.6876	-7.95
	-0.6865	-7.62
	-0.6854	-7391
	-0.6844	-7126
	-0.6833	-6808
	-0.6822	-6531
	-0.6812	-6189
	-0.6801	-5933
	-0.679	-5524
	-0.6779	-5286
	-0.6769	-4849
	-0.6758	-4636
	-0.6747	-4187
	-0.6737	-3949
	-0.6726	-3519
	-0.6715	-3268
	-0.6705	-2756
	-0.6694	-2444
	-0.6683	-2034
	-0.6673	-1642
	-0.6662	-1295
	-0.6651	-0.907
	-0.6641	-0.6238
	-0.663	-0.09857
	-0.6619	0.188
	-0.6609	0.7043
	-0.6598	0.9772
	-0.6587	1514
	-0.6577	1858
	-0.6566	2417
	-0.6555	2804
	-0.6544	3334
	-0.6534	3703
	-0.6523	4095
	-0.6512	4553
	-0.6502	4892
	-0.6491	5405
	-0.648	5688
	-0.647	6213
	-0.6459	6448
	-0.6448	6961
	-0.6438	7327
	-0.6427	7.91
	-0.6416	8218
	-0.6406	8737
	-0.6395	9106
	-0.6384	9595
	-0.6374	9995
	-0.6363	10.58
	-0.6352	11.15
	-0.6342	11.57
	-0.6331	12.05
	-0.632	12.2
	-0.631	12.65
	-0.6299	12.9
	-0.6288	13.39
	-0.6277	13.6
	-0.6267	14.12
	-0.6256	14.7
	-0.6245	15.51
	-0.6235	15.48
	-0.6224	15.77
	-0.6213	15.99
	-0.6203	16.28
	-0.6192	16.57
	-0.6181	16.82
	-0.6171	17.17
	-0.616	17.36
	-0.6149	17.81
	-0.6139	17.96
	-0.6128	18.38
	-0.6117	18.49
	-0.6107	18.92
	-0.6096	19.05
	-0.6085	19.39
	-0.6075	19.53
	-0.6064	19.85
	-0.6053	20.03
	-0.6042	20.23
	-0.6032	20.47
	-0.6021	20.55
	-0.601	20.79
	-0.6	20.83
	-0.5989	21.05
	-0.5978	21.13
	-0.5968	21.35
	-0.5957	21.33
	-0.5946	21.56
	-0.5936	21.54
	-0.5925	21.71
	-0.5914	21.75
	-0.5904	21.86
	-0.5893	21.91
	-0.5882	21.96
	-0.5872	22.09
	-0.5861	22.04
	-0.585	22.13
	-0.584	22.09
	-0.5829	22.22
	-0.5818	22.11
	-0.5807	22.26
	-0.5797	22.14
	-0.5786	22.22
	-0.5775	22.06
	-0.5765	22.15
	-0.5754	22.03
	-0.5743	22.01
	-0.5733	22.05
	-0.5722	21.92
	-0.5711	21.87
	-0.5701	21.73
	-0.569	21.76
	-0.5679	21.6
	-0.5669	21.72
	-0.5658	21.52
	-0.5647	21.55
	-0.5637	21.26
	-0.5626	21.25
	-0.5615	21.06
	-0.5605	21.03
	-0.5594	20.93
	-0.5583	20.88
	-0.5573	20.81
	-0.5562	20.72
	-0.5551	20.61
	-0.554	20.43
	-0.553	20.41
	-0.5519	20.23
	-0.5508	20.24
	-0.5498	20.04
	-0.5487	20.1
	-0.5476	19.92
	-0.5466	19.94
	-0.5455	19.78
	-0.5444	19.77
	-0.5434	19.65
	-0.5423	19.61
	-0.5412	19.58
	-0.5402	19.49
	-0.5391	19.47
	-0.538	19.35
	-0.537	19.43
	-0.5359	19.28
	-0.5348	19.36
	-0.5338	19.23
	-0.5327	19.29
	-0.5316	19.21
	-0.5305	19.24
	-0.5295	19.13
	-0.5284	19.2
	-0.5273	19.12
	-0.5263	19.13
	-0.5252	19.15
	-0.5241	19.11
	-0.5231	19.17
	-0.522	19.08
	-0.5209	19.18
	-0.5199	19.04
	-0.5188	19.15
	-0.5177	19.07
	-0.5167	19.19
	-0.5156	19.08
	-0.5145	19.2
	-0.5135	19.1
	-0.5124	19.2
	-0.5113	19.2
	-0.5103	19.24
	-0.5092	19.26
	-0.5081	19.27
	-0.507	19.29
	-0.506	19.27
	-0.5049	19.4
	-0.5038	19.34
	-0.5028	19.48
	-0.5017	19.37
	-0.5006	19.51
	-0.4996	19.44
	-0.4985	19.59
	-0.4974	19.55
	-0.4964	19.64
	-0.4953	19.65
	-0.4942	19.74
	-0.4932	19.8
	-0.4921	19.79
	-0.491	19.89
	-0.49	19.85
	-0.4889	20.02
	-0.4878	19.97
	-0.4868	20.14
	-0.4857	20.07
	-0.4846	20.2
	-0.4836	20.12
	-0.4825	20.3
	-0.4814	20.27
	-0.4803	20.41
	-0.4793	20.44
	-0.4782	20.5
	-0.4771	20.57
	-0.4761	20.63
	-0.475	20.76
	-0.4739	20.83
	-0.4729	21.01
	-0.4718	20.9
	-0.4707	21.06
	-0.4697	21.01
	-0.4686	21.22
	-0.4675	21.18
	-0.4665	21.38
	-0.4654	21.36
	-0.4643	21.48
	-0.4633	21.55
	-0.4622	21.61
	-0.4611	21.76
	-0.4601	21.76
	-0.459	21.94
	-0.4579	21.93
	-0.4568	22.14
	-0.4558	22.12
	-0.4547	22.33
	-0.4536	22.27
	-0.4526	22.47
	-0.4515	22.43
	-0.4504	22.61
	-0.4494	22.62
	-0.4483	22.74
	-0.4472	22.82
	-0.4462	22.91
	-0.4451	23.01
	-0.444	23.07
	-0.443	23.21
	-0.4419	23.21
	-0.4408	23.37
	-0.4398	23.36
	-0.4387	23.54
	-0.4376	23.51
	-0.4366	23.7
	-0.4355	23.68
	-0.4344	23.85
	-0.4333	23.9
	-0.4323	24.02
	-0.4312	24.07
	-0.4301	24.17
	-0.4291	24.26
	-0.428	24.31
	-0.4269	24.48
	-0.4259	24.48
	-0.4248	24.69
	-0.4237	24.68
	-0.4227	24.9
	-0.4216	24.85
	-0.4205	25.07
	-0.4195	25.05
	-0.4184	25.24
	-0.4173	25.27
	-0.4163	25.4
	-0.4152	25.46
	-0.4141	25.56
	-0.4131	25.69
	-0.412	25.74
	-0.4109	25.9
	-0.4099	25.9
	-0.4088	26.11
	-0.4077	26.09
	-0.4066	26.32
	-0.4056	26.25
	-0.4045	26.51
	-0.4034	26.52
	-0.4024	26.69
	-0.4013	26.74
	-0.4002	26.88
	-0.3992	26.97
	-0.3981	27.08
	-0.397	27.22
	-0.396	27.27
	-0.3949	27.5
	-0.3938	27.49
	-0.3928	27.72
	-0.3917	27.71
	-0.3906	27.95
	-0.3896	27.94
	-0.3885	28.17
	-0.3874	28.19
	-0.3864	28.38
	-0.3853	28.44
	-0.3842	28.59
	-0.3831	28.73
	-0.3821	28.81
	-0.381	28.97
	-0.3799	29.03
	-0.3789	29.24
	-0.3778	29.28
	-0.3767	29.47
	-0.3757	29.51
	-0.3746	29.75
	-0.3735	29.76
	-0.3725	29.98
	-0.3714	30
	-0.3703	30.13
	-0.3693	30.25
	-0.3682	30.39
	-0.3671	30.52
	-0.3661	30.61
	-0.365	30.81
	-0.3639	30.91
	-0.3629	31.08
	-0.3618	31.14
	-0.3607	31.36
	-0.3596	31.34
	-0.3586	31.55
	-0.3575	31.52
	-0.3564	31.76
	-0.3554	31.74
	-0.3543	31.96
	-0.3532	32.03
	-0.3522	32.22
	-0.3511	32.34
	-0.35	32.42
	-0.349	32.6
	-0.3479	32.68
	-0.3468	32.89
	-0.3458	32.91
	-0.3447	33.14
	-0.3436	33.13
	-0.3426	33.39
	-0.3415	33.37
	-0.3404	33.63
	-0.3394	33.64
	-0.3383	33.83
	-0.3372	33.87
	-0.3362	34.05
	-0.3351	34.16
	-0.334	34.18
	-0.3329	34.38
	-0.3319	34.44
	-0.3308	34.64
	-0.3297	34.62
	-0.3287	34.83
	-0.3276	34.8
	-0.3265	35.05
	-0.3255	35.04
	-0.3244	35.22
	-0.3233	35.2
	-0.3223	35.37
	-0.3212	35.41
	-0.3201	35.53
	-0.3191	35.62
	-0.318	35.67
	-0.3169	35.85
	-0.3159	35.83
	-0.3148	36
	-0.3137	35.99
	-0.3127	36.18
	-0.3116	36.29
	-0.3105	36.49
	-0.3094	36.43
	-0.3084	36.64
	-0.3073	36.59
	-0.3062	36.67
	-0.3052	36.71
	-0.3041	36.8
	-0.303	36.84
	-0.302	36.87
	-0.3009	37.01
	-0.2998	37.02
	-0.2988	37.19
	-0.2977	37.15
	-0.2966	37.34
	-0.2956	37.3
	-0.2945	37.48
	-0.2934	37.47
	-0.2924	37.65
	-0.2913	37.58
	-0.2902	37.73
	-0.2892	37.73
	-0.2881	37.83
	-0.287	37.92
	-0.2859	37.93
	-0.2849	38.08
	-0.2838	38.02
	-0.2827	38.2
	-0.2817	38.16
	-0.2806	38.35
	-0.2795	38.26
	-0.2785	38.45
	-0.2774	38.41
	-0.2763	38.57
	-0.2753	38.54
	-0.2742	38.67
	-0.2731	38.7
	-0.2721	38.8
	-0.271	38.87
	-0.2699	38.91
	-0.2689	39.02
	-0.2678	39
	-0.2667	39.19
	-0.2657	39.12
	-0.2646	39.3
	-0.2635	39.25
	-0.2625	39.43
	-0.2614	39.37
	-0.2603	39.56
	-0.2592	39.55
	-0.2582	39.72
	-0.2571	39.7
	-0.256	39.76
	-0.255	39.84
	-0.2539	39.86
	-0.2528	40.01
	-0.2518	39.99
	-0.2507	40.17
	-0.2496	40.11
	-0.2486	40.3
	-0.2475	40.23
	-0.2464	40.45
	-0.2454	40.37
	-0.2443	40.55
	-0.2432	40.53
	-0.2422	40.65
	-0.2411	40.67
	-0.24	41.02
	-0.239	40.96
	-0.2379	40.92
	-0.2368	41.03
	-0.2357	41.02
	-0.2347	41.18
	-0.2336	41.14
	-0.2325	41.35
	-0.2315	41.31
	-0.2304	41.54
	-0.2293	41.49
	-0.2283	41.62
	-0.2272	41.62
	-0.2261	41.72
	-0.2251	41.78
	-0.224	41.86
	-0.2229	41.93
	-0.2219	42.01
	-0.2208	42.09
	-0.2197	42.1
	-0.2187	42.29
	-0.2176	42.22
	-0.2165	42.44
	-0.2155	42.39
	-0.2144	42.58
	-0.2133	42.52
	-0.2122	42.71
	-0.2112	42.7
	-0.2101	42.84
	-0.209	42.91
	-0.208	42.99
	-0.2069	43.08
	-0.2058	43.11
	-0.2048	43.24
	-0.2037	43.26
	-0.2026	43.44
	-0.2016	43.4
	-0.2005	43.59
	-0.1994	43.59
	-0.1984	43.77
	-0.1973	43.75
	-0.1962	43.92
	-0.1952	43.93
	-0.1941	44.09
	-0.193	44.14
	-0.192	44.27
	-0.1909	44.42
	-0.1898	44.47
	-0.1888	44.59
	-0.1877	44.58
	-0.1866	44.77
	-0.1855	44.74
	-0.1845	44.97
	-0.1834	44.92
	-0.1823	45.15
	-0.1813	45.13
	-0.1802	45.34
	-0.1791	45.35
	-0.1781	45.48
	-0.177	45.56
	-0.1759	45.67
	-0.1749	45.79
	-0.1738	45.86
	-0.1727	46.04
	-0.1717	46.04
	-0.1706	46.26
	-0.1695	46.26
	-0.1685	46.51
	-0.1674	46.46
	-0.1663	46.7
	-0.1653	46.71
	-0.1642	46.9
	-0.1631	46.95
	-0.162	47.12
	-0.161	47.23
	-0.1599	47.36
	-0.1588	47.51
	-0.1578	47.6
	-0.1567	48.07
	-0.1556	48.62
	-0.1546	49.08
	-0.1535	49.22
	-0.1524	49.5
	-0.1514	49.41
	-0.1503	49.19
	-0.1492	48.98
	-0.1482	49.1
	-0.1471	49.09
	-0.146	49.26
	-0.145	49.32
	-0.1439	49.47
	-0.1428	49.68
	-0.1418	49.77
	-0.1407	49.99
	-0.1396	50.08
	-0.1385	50.35
	-0.1375	50.38
	-0.1364	50.66
	-0.1353	50.75
	-0.1343	51.03
	-0.1332	51.06
	-0.1321	51.3
	-0.1311	51.36
	-0.13	51.61
	-0.1289	51.76
	-0.1279	51.88
	-0.1268	52.06
	-0.1257	52.12
	-0.1247	52.34
	-0.1236	52.37
	-0.1225	52.61
	-0.1215	52.61
	-0.1204	52.86
	-0.1193	52.83
	-0.1183	53.07
	-0.1172	53.01
	-0.1161	53.19
	-0.1151	53.22
	-0.114	53.34
	-0.1129	53.44
	-0.1118	53.5
	-0.1108	53.62
	-0.1097	53.62
	-0.1086	53.74
	-0.1076	53.71
	-0.1065	53.89
	-0.1054	53.83
	-0.1044	54.02
	-0.1033	53.92
	-0.1022	54.11
	-0.1012	54.05
	-0.1001	54.2
	-0.09903	54.2
	-0.09796	54.29
	-0.09689	54.35
	-0.09583	54.38
	-0.09476	54.5
	-0.09369	54.5
	-0.09262	54.66
	-0.09155	54.63
	-0.09048	54.78
	-0.08942	54.72
	-0.08835	54.93
	-0.08728	54.84
	-0.08621	55.02
	-0.08514	55.02
	-0.08408	55.15
	-0.08301	55.18
	-0.08194	55.27
	-0.08087	55.3
	-0.0798	55.36
	-0.07874	55.48
	-0.07767	55.51
	-0.0766	55.69
	-0.07553	55.66
	-0.07446	55.82
	-0.07339	55.76
	-0.07233	55.97
	-0.07126	55.91
	-0.07019	56.06
	-0.06912	56.06
	-0.06805	56.18
	-0.06699	56.24
	-0.06592	56.34
	-0.06485	56.4
	-0.06378	56.46
	-0.06271	56.58
	-0.06165	56.58
	-0.06058	56.73
	-0.05951	56.7
	-0.05844	56.88
	-0.05737	56.82
	-0.0563	57.04
	-0.05524	57.01
	-0.05417	57.19
	-0.0531	57.16
	-0.05203	57.28
	-0.05096	57.34
	-0.0499	57.43
	-0.04883	57.53
	-0.04776	57.56
	-0.04669	57.68
	-0.04562	57.71
	-0.04456	57.86
	-0.04349	57.86
	-0.04242	58.07
	-0.04135	58.04
	-0.04028	58.23
	-0.03922	58.2
	-0.03815	58.38
	-0.03708	58.38
	-0.03601	58.53
	-0.03494	58.59
	-0.03387	58.75
	-0.03281	58.84
	-0.03174	58.9
	-0.03067	59.08
	-0.0296	59.08
	-0.02853	59.27
	-0.02747	59.27
	-0.0264	59.51
	-0.02533	59.51
	-0.02426	59.75
	-0.02319	59.75
	-0.02213	59.97
	-0.02106	60
	-0.01999	60.18
	-0.01892	60.27
	-0.01785	60.42
	-0.01678	60.58
	-0.01572	60.67
	-0.01465	60.88
	-0.01358	60.94
	-0.01251	61.19
	-0.01144	61.25
	-0.01038	61.49
	-0.00931	61.55
	-0.00824	61.83
	-0.00717	61.86
	-0.0061	62.1
	-0.00504	62.19
	-0.00397	62.44
	-0.0029	62.59
	-0.00183	62.77
	-0.7629	62.99
	0.3052	63.17
	0.00137	63.42
	0.00244	63.54
	0.00351	63.84
	0.00458	63.96
	0.00565	64.27
	0.00671	64.36
	0.00778	64.73
	0.00885	64.85
	0.00992	65.16
	0.01099	65.31
	0.01205	65.61
	0.01312	65.83
	0.01419	66.13
	0.01526	66.41
	0.01633	66.65
	0.0174	66.96
	0.01846	67.17
	0.01953	67.54
	0.0206	67.78
	0.02167	68.21
	0.02274	68.45
	0.0238	68.88
	0.02487	69.09
	0.02594	69.55
	0.02701	69.79
	0.02808	70.22
	0.02914	70.56
	0.03021	70.92
	0.03128	71.35
	0.03235	71.72
	0.03342	72.17
	0.03448	72.48
	0.03555	72.91
	0.03662	73.24
	0.03769	73.76
	0.03876	74.07
	0.03983	74.62
	0.04089	74.95
	0.04196	75.47
	0.04303	75.81
	0.0441	76.29
	0.04517	76.66
	0.04623	77.12
	0.0473	77.55
	0.04837	77.91
	0.04944	78.4
	0.05051	78.7
	0.05157	79.19
	0.05264	79.47
	0.05371	79.99
	0.05478	80.26
	0.05585	80.72
	0.05692	80.96
	0.05798	81.39
	0.05905	81.67
	0.06012	82.06
	0.06119	82.34
	0.06226	82.64
	0.06332	82.95
	0.06439	83.19
	0.06546	83.47
	0.06653	83.65
	0.0676	83.92
	0.06866	83.98
	0.06973	84.29
	0.0708	84.35
	0.07187	84.59
	0.07294	84.66
	0.07401	84.84
	0.07507	84.87
	0.07614	85.02
	0.07721	85.05
	0.07828	85.11
	0.07935	85.21
	0.08041	85.21
	0.08148	85.17
	0.08255	85.11
	0.08362	85.14
	0.08469	85.02
	0.08575	85.05
	0.08682	84.9
	0.08789	84.93
	0.08896	84.78
	0.09003	84.75
	0.09109	84.56
	0.09216	84.5
	0.09323	84.41
	0.0943	84.29
	0.09537	84.2
	0.09644	84.08
	0.0975	83.98
	0.09857	83.83
	0.09964	83.8
	0.1007	83.62
	0.1018	83.59
	0.1028	83.4
	0.1039	83.4
	0.105	83.22
	0.106	83.22
	0.1071	83.07
	0.1082	83.04
	0.1093	82.92
	0.1103	82.86
	0.1114	82.82
	0.1125	82.73
	0.1135	82.7
	0.1146	82.61
	0.1157	82.64
	0.1167	82.49
	0.1178	82.52
	0.1189	82.4
	0.1199	82.43
	0.121	82.34
	0.1221	82.37
	0.1231	82.31
	0.1242	82.31
	0.1253	82.24
	0.1263	82.21
	0.1274	82.18
	0.1285	82.18
	0.1295	82.18
	0.1306	82.09
	0.1317	82.15
	0.1328	82.09
	0.1338	82.15
	0.1349	82.03
	0.136	82.12
	0.137	82.03
	0.1381	82.09
	0.1392	82.03
	0.1402	82.09
	0.1413	82.06
	0.1424	82.06
	0.1434	82.12
	0.1445	82.06
	0.1456	82.09
	0.1466	82
	0.1477	82.12
	0.1488	82.06
	0.1498	82.15
	0.1509	82.09
	0.152	82.18
	0.153	82.12
	0.1541	82.18
	0.1552	82.15
	0.1563	82.18
	0.1573	82.24
	0.1584	82.28
	0.1595	82.31
	0.1605	82.31
	0.1616	82.4
	0.1627	82.34
	0.1637	82.43
	0.1648	82.37
	0.1659	82.46
	0.1669	82.4
	0.168	82.49
	0.1691	82.43
	0.1701	82.49
	0.1712	82.46
	0.1723	82.49
	0.1733	82.52
	0.1744	82.49
	0.1755	82.52
	0.1765	82.49
	0.1776	82.55
	0.1787	82.46
	0.1797	82.58
	0.1808	82.49
	0.1819	82.61
	0.183	82.52
	0.184	82.61
	0.1851	82.55
	0.1862	82.58
	0.1872	82.55
	0.1883	82.58
	0.1894	82.58
	0.1904	82.52
	0.1915	82.61
	0.1926	82.55
	0.1936	82.58
	0.1947	82.52
	0.1958	82.58
	0.1968	82.52
	0.1979	82.58
	0.199	82.52
	0.2	82.55
	0.2011	82.49
	0.2022	82.52
	0.2032	82.46
	0.2043	82.46
	0.2054	82.46
	0.2065	82.43
	0.2075	82.46
	0.2086	82.4
	0.2097	82.4
	0.2107	82.34
	0.2118	82.4
	0.2129	82.28
	0.2139	82.37
	0.215	82.24
	0.2161	82.34
	0.2171	82.21
	0.2182	82.28
	0.2193	82.18
	0.2203	82.21
	0.2214	82.15
	0.2225	82.12
	0.2235	82.15
	0.2246	82.06
	0.2257	82.12
	0.2267	82.03
	0.2278	82.06
	0.2289	81.97
	0.23	82.06
	0.231	81.97
	0.2321	82
	0.2332	81.94
	0.2342	81.97
	0.2353	81.94
	0.2364	81.97
	0.2374	81.97
	0.2385	81.91
	0.2396	81.97
	0.2406	81.91
	0.2417	82
	0.2428	81.91
	0.2438	82
	0.2449	81.91
	0.246	81.97
	0.247	81.91
	0.2481	82
	0.2492	81.94
	0.2502	82
	0.2513	81.97
	0.2524	82
	0.2534	82
	0.2545	82
	0.2556	82.03
	0.2567	81.94
	0.2577	82.06
	0.2588	81.97
	0.2599	82.03
	0.2609	81.91
	0.262	82
	0.2631	81.91
	0.2641	81.94
	0.2652	81.85
	0.2663	81.85
	0.2673	81.76
	0.2684	81.7
	0.2695	81.67
	0.2705	81.6
	0.2716	81.57
	0.2727	81.42
	0.2737	81.39
	0.2748	81.27
	0.2759	81.27
	0.2769	81.12
	0.278	81.09
	0.2791	80.93
	0.2802	80.87
	0.2812	80.75
	0.2823	80.66
	0.2834	80.57
	0.2844	80.44
	0.2855	80.35
	0.2866	80.23
	0.2876	80.17
	0.2887	80.02
	0.2898	80.02
	0.2908	79.9
	0.2919	79.86
	0.293	79.77
	0.294	79.8
	0.2951	79.62
	0.2962	79.68
	0.2972	79.53
	0.2983	79.56
	0.2994	79.47
	0.3004	79.41
	0.3015	79.41
	0.3026	79.32
	0.3036	79.35
	0.3047	79.25
	0.3058	79.25
	0.3069	79.16
	0.3079	79.22
	0.309	79.1
	0.3101	79.16
	0.3111	79.04
	0.3122	79.1
	0.3133	79.19
	0.3143	79.13
	0.3154	79.07
	0.3165	79.04
	0.3175	79.04
	0.3186	78.98
	0.3197	79.01
	0.3207	78.95
	0.3218	78.95
	0.3229	78.89
	0.3239	78.95
	0.325	78.86
	0.3261	78.92
	0.3271	78.83
	0.3282	78.86
	0.3293	78.8
	0.3304	78.83
	0.3314	78.8
	0.3325	78.77
	0.3336	78.8
	0.3346	78.77
	0.3357	78.8
	0.3368	78.7
	0.3378	78.77
	0.3389	78.74
	0.34	78.77
	0.341	78.67
	0.3421	78.74
	0.3432	78.64
	0.3442	78.7
	0.3453	78.64
	0.3464	78.61
	0.3474	78.61
	0.3485	78.61
	0.3496	78.61
	0.3506	78.55
	0.3517	78.58
	0.3528	78.49
	0.3539	78.55
	0.3549	78.52
	0.356	78.55
	0.3571	78.46
	0.3581	78.49
	0.3592	78.43
	0.3603	78.46
	0.3613	78.4
	0.3624	78.43
	0.3635	78.4
	0.3645	78.37
	0.3656	78.37
	0.3667	78.34
	0.3677	78.37
	0.3688	78.34
	0.3699	78.37
	0.3709	78.28
	0.372	78.37
	0.3731	78.31
	0.3741	78.37
	0.3752	78.28
	0.3763	78.34
	0.3773	78.31
	0.3784	78.31
	0.3795	78.31
	0.3806	78.31
	0.3816	78.34
	0.3827	78.31
	0.3838	78.37
	0.3848	78.31
	0.3859	78.4
	0.387	78.31
	0.388	78.4
	0.3891	78.34
	0.3902	78.43
	0.3912	78.4
	0.3923	78.46
	0.3934	78.46
	0.3944	78.49
	0.3955	78.52
	0.3966	78.55
	0.3976	78.55
	0.3987	78.55
	0.3998	78.61
	0.4008	78.58
	0.4019	78.67
	0.403	78.64
	0.4041	78.7
	0.4051	78.7
	0.4062	78.77
	0.4073	78.74
	0.4083	78.83
	0.4094	78.8
	0.4105	78.86
	0.4115	78.89
	0.4126	78.92
	0.4137	78.98
	0.4147	78.95
	0.4158	79.07
	0.4169	79.01
	0.4179	79.13
	0.419	79.1
	0.4201	79.19
	0.4211	79.13
	0.4222	79.25
	0.4233	79.25
	0.4243	79.32
	0.4254	79.32
	0.4265	79.41
	0.4276	79.41
	0.4286	79.44
	0.4297	79.5
	0.4308	79.56
	0.4318	79.62
	0.4329	79.62
	0.434	79.68
	0.435	79.65
	0.4361	79.74
	0.4372	79.74
	0.4382	79.83
	0.4393	79.8
	0.4404	79.9
	0.4414	79.9
	0.4425	79.96
	0.4436	79.96
	0.4446	79.99
	0.4457	80.05
	0.4468	80.05
	0.4478	80.14
	0.4489	80.08
	0.45	80.17
	0.451	80.14
	0.4521	80.26
	0.4532	80.2
	0.4543	80.29
	0.4553	80.23
	0.4564	80.32
	0.4575	80.32
	0.4585	80.35
	0.4596	80.38
	0.4607	80.41
	0.4617	80.47
	0.4628	80.47
	0.4639	80.57
	0.4649	80.54
	0.466	80.63
	0.4671	80.6
	0.4681	80.69
	0.4692	80.69
	0.4703	80.78
	0.4713	80.78
	0.4724	80.87
	0.4735	80.9
	0.4745	80.99
	0.4756	81.02
	0.4767	81.05
	0.4778	81.15
	0.4788	81.15
	0.4799	81.27
	0.481	81.3
	0.482	81.42
	0.4831	81.42
	0.4842	81.57
	0.4852	81.57
	0.4863	81.7
	0.4874	81.7
	0.4884	81.85
	0.4895	81.91
	0.4906	82
	0.4916	82.06
	0.4927	82.15
	0.4938	82.21
	0.4948	82.31
	0.4959	82.43
	0.497	82.46
	0.498	82.58
	0.4991	82.64
	0.5002	82.79
	0.5013	82.82
	0.5023	82.95
	0.5034	83.04
	0.5045	83.16
	0.5055	83.22
	0.5066	83.31
	0.5077	83.4
	0.5087	83.5
	0.5098	83.65
	0.5109	83.71
	0.5119	83.86
	0.513	83.89
	0.5141	84.08
	0.5151	84.14
	0.5162	84.29
	0.5173	84.32
	0.5183	84.47
	0.5194	84.53
	0.5205	84.69
	0.5215	84.75
	0.5226	84.87
	0.5237	84.99
	0.5247	85.08
	0.5258	85.17
	0.5269	85.27
	0.528	85.42
	0.529	85.48
	0.5301	85.63
	0.5312	85.66
	0.5322	85.82
	0.5333	85.85
	0.5344	86
	0.5354	86.06
	0.5365	86.18
	0.5376	86.24
	0.5386	86.36
	0.5397	86.43
	0.5408	86.52
	0.5418	86.67
	0.5429	86.7
	0.544	86.82
	0.545	86.85
	0.5461	87.01
	0.5472	87.04
	0.5482	87.19
	0.5493	87.16
	0.5504	87.34
	0.5515	87.34
	0.5525	87.49
	0.5536	87.52
	0.5547	87.59
	0.5557	87.68
	0.5568	87.71
	0.5579	87.83
	0.5589	87.86
	0.56	87.95
	0.5611	87.95
	0.5621	88.1
	0.5632	88.1
	0.5643	88.23
	0.5653	88.2
	0.5664	88.35
	0.5675	88.38
	0.5685	88.44
	0.5696	88.5
	0.5707	88.56
	0.5717	88.65
	0.5728	88.68
	0.5739	88.78
	0.575	88.78
	0.576	88.9
	0.5771	88.93
	0.5782	89.02
	0.5792	89.02
	0.5803	89.14
	0.5814	89.17
	0.5824	89.29
	0.5835	89.29
	0.5846	89.42
	0.5856	89.45
	0.5867	89.54
	0.5878	89.63
	0.5888	89.66
	0.5899	89.78
	0.591	89.84
	0.592	89.97
	0.5931	89.97
	0.5942	90.12
	0.5952	90.12
	0.5963	90.24
	0.5974	90.3
	0.5984	90.45
	0.5995	90.52
	0.6006	90.61
	0.6017	90.7
	0.6027	90.76
	0.6038	90.85
	0.6049	90.94
	0.6059	91.09
	0.607	91.13
	0.6081	91.31
	0.6091	91.34
	0.6102	91.49
	0.6113	91.55
	0.6123	91.74
	0.6134	91.8
	0.6145	91.95
	0.6155	91.98
	0.6166	92.16
	0.6177	92.29
	0.6187	92.41
	0.6198	92.56
	0.6209	92.65
	0.6219	92.8
	0.623	92.9
	0.6241	93.08
	0.6252	93.17
	0.6262	93.38
	0.6273	93.51
	0.6284	93.66
	0.6294	93.75
	0.6305	93.93
	0.6316	94.06
	0.6326	94.24
	0.6337	94.39
	0.6348	94.54
	0.6358	94.76
	0.6369	94.88
	0.638	95.06
	0.639	95.15
	0.6401	95.4
	0.6412	95.49
	0.6422	95.73
	0.6433	95.86
	0.6444	96.07
	0.6454	96.19
	0.6465	96.41
	0.6476	96.56
	0.6487	96.77
	0.6497	96.92
	0.6508	97.14
	0.6519	97.35
	0.6529	97.47
	0.654	97.69
	0.6551	97.84
	0.6561	98.08
	0.6572	98.18
	0.6583	98.42
	0.6593	98.57
	0.6604	98.82
	0.6615	98.94
	0.6625	99.18
	0.6636	99.3
	0.6647	99.49
	0.6657	99.7
	0.6668	99.88
	0.6679	100.1
	0.6689	100.3
	0.67	100.5
	0.6711	100.6
	0.6721	100.9
	0.6732	101
	0.6743	101.3
	0.6754	101.4
	0.6764	101.7
	0.6775	101.8
	0.6786	102.1
	0.6796	102.3
	0.6807	102.5
	0.6818	102.7
	0.6828	102.9
	0.6839	103.1
	0.685	103.4
	0.686	103.6
	0.6871	103.8
	0.6882	104.1
	0.6892	104.2
	0.6903	104.5
	0.6914	104.7
	0.6924	105
	0.6935	105.2
	0.6946	105.5
	0.6956	105.7
	0.6967	105.9
	0.6978	106.1
	0.6989	106.4
	0.6999	106.7
	0.701	106.9
	0.7021	107.2
	0.7031	107.4
	0.7042	107.7
	0.7053	107.9
	0.7063	108.2
	0.7074	108.4
	0.7085	108.7
	0.7095	108.9
	0.7106	109.2
	0.7117	109.4
	0.7127	109.6
	0.7138	109.9
	0.7149	110.1
	0.7159	110.4
	0.717	110.6
	0.7181	110.9
	0.7191	111.1
	0.7202	111.3
	0.7213	111.5
	0.7224	111.8
	0.7234	112
	0.7245	112.2
	0.7256	112.5
	0.7266	112.7
	0.7277	112.9
	0.7288	113.2
	0.7298	113.4
	0.7309	113.7
	0.732	113.9
	0.733	114.1
	0.7341	114.3
	0.7352	114.5
	0.7362	114.8
	0.7373	115
	0.7384	115.3
	0.7394	115.4
	0.7405	115.8
	0.7416	115.9
	0.7426	116.2
	0.7437	116.4
	0.7448	116.6
	0.7458	116.9
	0.7469	117.1
	0.748	117.3
	0.7491	117.6
	0.7501	117.9
	0.7512	118
	0.7523	118.3
	0.7533	118.6
	0.7544	118.9
	0.7555	119
	0.7565	119.4
	0.7576	119.6
	0.7587	119.9
	0.7597	120.1
	0.7608	120.4
	0.7619	120.7
	0.7629	120.9
	0.764	121.2
	0.7651	121.5
	0.7661	121.8
	0.7672	122
	0.7683	122.4
	0.7693	122.6
	0.7704	123
	0.7715	123.2
	0.7726	123.5
	0.7736	123.7
	0.7747	124.1
	0.7758	124.4
	0.7768	124.7
	0.7779	124.9
	0.779	125.2
	0.78	125.5
	0.7811	125.8
	0.7822	126.2
	0.7832	126.4
	0.7843	126.8
	0.7854	127
	0.7864	127.4
	0.7875	127.7
	0.7886	128
	0.7896	128.3
	0.7907	128.6
	0.7918	128.9
	0.7928	129.2
	0.7939	129.6
	0.795	129.9
	0.7961	130.2
	0.7971	130.5
	0.7982	130.9
	0.7993	131.2
	0.8003	131.6
	0.8014	131.8
	0.8025	132.2
	0.8035	132.5
	0.8046	132.9
	0.8057	133.2
	0.8067	133.6
	0.8078	133.9
	0.8089	134.3
	0.8099	134.6
	0.811	135
	0.8121	135.3
	0.8131	135.7
	0.8142	136.1
	0.8153	136.5
	0.8163	136.9
	0.8174	137.2
	0.8185	137.6
	0.8195	137.9
	0.8206	138.4
	0.8217	138.7
	0.8228	139.2
	0.8238	139.6
	0.8249	140
	0.826	140.4
	0.827	140.7
	0.8281	141.2
	0.8292	141.6
	0.8302	142
	0.8313	142.4
	0.8324	142.9
	0.8334	143.2
	0.8345	143.7
	0.8356	144.1
	0.8366	144.6
	0.8377	145
	0.8388	145.5
	0.8398	145.9
	0.8409	146.4
	0.842	146.8
	0.843	147.2
	0.8441	147.7
	0.8452	148.2
	0.8463	148.7
	0.8473	149.1
	0.8484	149.6
	0.8495	150.1
	0.8505	150.6
	0.8516	151.1
	0.8527	151.6
	0.8537	152.1
	0.8548	152.6
	0.8559	153.1
	0.8569	153.6
	0.858	154.1
	0.8591	154.6
	0.8601	155.2
	0.8612	155.7
	0.8623	156.3
	0.8633	156.7
	0.8644	157.3
	0.8655	157.8
	0.8665	158.5
	0.8676	159
	0.8687	159.6
	0.8698	160.1
	0.8708	160.7
	0.8719	161.3
	0.873	161.9
	0.874	162.5
	0.8751	163.1
	0.8762	163.6
	0.8772	164.2
	0.8783	164.9
	0.8794	165.5
	0.8804	166.1
	0.8815	166.7
	0.8826	167.4
	0.8836	167.9
	0.8847	168.6
	0.8858	169.3
	0.8868	169.9
	0.8879	170.5
	0.889	171.2
	0.89	171.9
	0.8911	172.5
	0.8922	173.2
	0.8932	173.9
	0.8943	174.6
	0.8954	175.3
	0.8965	176
	0.8975	176.6
	0.8986	177.4
	0.8997	178
	0.9007	178.8
	0.9018	179.5
	0.9029	180.3
	0.9039	181
	0.905	181.8
	0.9061	182.6
	0.9071	183.3
	0.9082	184.1
	0.9093	184.9
	0.9103	185.8
	0.9114	186.5
	0.9125	187.4
	0.9135	188.2
	0.9146	189.1
	0.9157	189.9
	0.9167	190.8
	0.9178	191.6
	0.9189	192.6
	0.92	193.4
	0.921	194.3
	0.9221	195.3
	0.9232	196.1
	0.9242	197.1
	0.9253	198
	0.9264	199
	0.9274	199.9
	0.9285	201
	0.9296	201.9
	0.9306	202.9
	0.9317	203.9
	0.9328	205
	0.9338	206
	0.9349	207.2
	0.936	208.2
	0.937	209.3
	0.9381	210.5
	0.9392	211.6
	0.9402	212.8
	0.9413	213.9
	0.9424	215.1
	0.9435	216.2
	0.9445	217.6
	0.9456	218.7
	0.9467	220
	0.9477	221.2
	0.9488	222.5
	0.9499	223.8
	0.9509	225.1
	0.952	226.3
	0.9531	227.7
	0.9541	229
	0.9552	230.3
	0.9563	231.8
	0.9573	233.1
	0.9584	234.5
	0.9595	235.9
	0.9605	237.4
	0.9616	238.8
	0.9627	240.3
	0.9637	241.7
	0.9648	243.3
	0.9659	244.7
	0.9669	246.3
	0.968	247.8
	0.9691	249.3
	0.9702	250.9
	0.9712	252.5
	0.9723	254.1
	0.9734	255.7
	0.9744	257.4
	0.9755	258.9
	0.9766	260.6
	0.9776	262.2
	0.9787	263.9
	0.9798	265.6
	0.9808	267.3
	0.9819	269
	0.983	270.7
	0.984	272.3
[truncated: 2,215 more rows]

## Sheet: Fig 3A
	Spectrophotometric studies ds-ctDNA
	Wavenumber	Absorbance
	nm	a.u.
	200	0.171	1263	1.51	2164	2333	2.81
	201	0.169	1226	1472	2101	2254	2.74
	202	0.166	1186	1424	2038	2195	2679
	203	0.161	1143	1374	1968	2121	2601
	204	0.155	1102	1325	1899	2.05	2516
	205	0.147	1058	1274	1829	1972	2435
	206	0.138	1017	1225	1762	1902	2342
	207	0.129	0.974	1175	1695	1828	2261
	208	0.121	0.932	1126	1626	1757	2173
	209	0.115	0.894	1081	1563	1686	2.09
	210	0.111	0.858	1037	1.5	1.62	2007
	211	0.107	0.822	0.993	1437	1553	1923
	212	0.105	0.787	0.951	1377	1486	1841
	213	0.103	0.752	0.909	1314	1.42	1758
	214	0.102	0.716	0.865	1248	1349	1672
	215	0.1	0.68	0.821	1184	1279	1584
	216	0.099	0.645	0.779	1123	1212	1502
	217	0.099	0.61	0.737	1.06	1143	1416
	218	0.098	0.576	0.695	0.998	1075	1331
	219	0.097	0.544	0.655	0.94	1013	1252
	220	0.096	0.513	0.616	0.883	0.951	1175
	221	0.095	0.481	0.578	0.827	0.889	1099
	222	0.093	0.453	0.543	0.775	0.834	1029
	223	0.092	0.428	0.513	0.73	0.786	0.969
	224	0.091	0.406	0.486	0.691	0.743	0.916
	225	0.09	0.388	0.464	0.659	0.708	0.873
	226	0.089	0.374	0.447	0.635	0.682	0.839
	227	0.088	0.362	0.433	0.614	0.66	0.812
	228	0.088	0.354	0.422	0.599	0.643	0.792
	229	0.087	0.348	0.415	0.589	0.632	0.778
	230	0.086	0.344	0.411	0.583	0.626	0.771
	231	0.085	0.342	0.409	0.581	0.624	0.769
	232	0.083	0.343	0.41	0.583	0.627	0.773
	233	0.081	0.346	0.414	0.59	0.635	0.783
	234	0.079	0.351	0.421	0.602	0.648	0.799
	235	0.078	0.359	0.43	0.617	0.665	0.822
	236	0.076	0.369	0.443	0.638	0.687	0.85
	237	0.075	0.382	0.459	0.662	0.714	0.884
	238	0.074	0.397	0.478	0.691	0.746	0.924
	239	0.073	0.413	0.499	0.723	0.78	0.967
	240	0.073	0.432	0.522	0.758	0.819	1014
	241	0.072	0.452	0.546	0.795	0.86	1066
	242	0.072	0.474	0.573	0.835	0.904	1122
	243	0.072	0.496	0.6	0.876	0.95	1179
	244	0.072	0.518	0.628	0.919	0.996	1237
	245	0.072	0.542	0.657	0.963	1043	1297
	246	0.072	0.566	0.687	1007	1091	1356
	247	0.072	0.589	0.715	1.05	1138	1414
	248	0.072	0.611	0.743	1091	1183	1469
	249	0.073	0.633	0.769	1131	1226	1525
	250	0.073	0.654	0.794	1168	1268	1575
	251	0.072	0.673	0.817	1202	1305	1622
	252	0.072	0.688	0.836	1.23	1336	1.66
	253	0.072	0.701	0.852	1254	1362	1694
	254	0.072	0.711	0.865	1274	1383	1.72
	255	0.072	0.72	0.875	1289	1.4	1.74
	256	0.072	0.726	0.883	1.3	1411	1756
	257	0.072	0.73	0.888	1307	1419	1764
	258	0.072	0.732	0.891	1311	1423	1.77
	259	0.072	0.732	0.89	1.31	1422	1769
	260	0.072	0.73	0.887	1305	1417	1761
	261	0.073	0.725	0.881	1295	1405	1746
	262	0.073	0.718	0.872	1281	1391	1727
	263	0.073	0.708	0.86	1263	1371	1703
	264	0.073	0.697	0.846	1243	1348	1676
	265	0.074	0.685	0.831	1219	1323	1644
	266	0.074	0.672	0.815	1195	1297	1612
	267	0.073	0.658	0.798	1169	1269	1576
	268	0.073	0.644	0.781	1143	1239	1539
	269	0.073	0.628	0.762	1115	1209	1.5
	270	0.073	0.613	0.743	1087	1177	1.46
	271	0.072	0.596	0.722	1056	1144	1418
	272	0.072	0.578	0.7	1021	1107	1372
	273	0.071	0.559	0.676	0.986	1068	1324
	274	0.071	0.538	0.651	0.949	1028	1274
	275	0.07	0.517	0.625	0.91	0.986	1221
	276	0.069	0.497	0.601	0.873	0.945	1172
	277	0.069	0.477	0.575	0.836	0.905	1121
	278	0.068	0.456	0.551	0.799	0.863	1.07
	279	0.067	0.436	0.526	0.762	0.824	1019
	280	0.066	0.416	0.502	0.726	0.784	0.97
	281	0.065	0.395	0.476	0.687	0.742	0.918
	282	0.064	0.373	0.449	0.647	0.699	0.864
	283	0.063	0.35	0.421	0.605	0.653	0.807
	284	0.062	0.326	0.391	0.562	0.606	0.748
	285	0.061	0.302	0.363	0.519	0.559	0.69
	286	0.06	0.279	0.334	0.476	0.512	0.632
	287	0.059	0.256	0.306	0.435	0.468	0.575
	288	0.058	0.234	0.28	0.396	0.425	0.522
	289	0.057	0.214	0.255	0.359	0.385	0.47
	290	0.056	0.193	0.23	0.322	0.344	0.421
	291	0.055	0.174	0.207	0.287	0.307	0.374
	292	0.055	0.156	0.184	0.253	0.27	0.329
	293	0.054	0.138	0.163	0.221	0.235	0.286
	294	0.053	0.122	0.143	0.192	0.202	0.245
	295	0.052	0.107	0.125	0.166	0.174	0.21
	296	0.052	0.094	0.109	0.142	0.148	0.178
	297	0.052	0.084	0.096	0.122	0.127	0.15
	298	0.052	0.074	0.085	0.106	0.109	0.128
	299	0.052	0.067	0.075	0.092	0.094	0.11
	300	0.052	0.061	0.068	0.08	0.082	0.094
	301	0.052	0.056	0.061	0.071	0.071	0.081
	302	0.053	0.052	0.057	0.063	0.063	0.071
	303	0.053	0.049	0.053	0.058	0.057	0.063
	304	0.053	0.047	0.05	0.053	0.052	0.057
	305	0.054	0.045	0.048	0.05	0.049	0.052
	306	0.055	0.044	0.047	0.048	0.046	0.047
	307	0.055	0.044	0.046	0.046	0.043	0.044
	308	0.055	0.043	0.045	0.044	0.042	0.042
	309	0.055	0.042	0.044	0.043	0.04	0.04
	310	0.055	0.041	0.044	0.042	0.039	0.039
	311	0.055	0.041	0.043	0.04	0.037	0.037
	312	0.055	0.04	0.042	0.039	0.036	0.036
	313	0.054	0.039	0.041	0.039	0.036	0.034
	314	0.054	0.039	0.041	0.038	0.035	0.034
	315	0.054	0.038	0.04	0.037	0.034	0.033
	316	0.053	0.037	0.039	0.036	0.033	0.032
	317	0.053	0.037	0.039	0.035	0.032	0.031
	318	0.052	0.036	0.038	0.035	0.032	0.03
	319	0.052	0.036	0.038	0.034	0.031	0.03
	320	0.051	0.035	0.037	0.034	0.03	0.029
	321	0.051	0.035	0.037	0.033	0.03	0.028
	322	0.051	0.035	0.036	0.033	0.029	0.028
	323	0.051	0.034	0.036	0.032	0.029	0.027
	324	0.05	0.034	0.035	0.032	0.029	0.027
	325	0.05	0.034	0.035	0.031	0.028	0.026
	326	0.049	0.033	0.035	0.031	0.028	0.026
	327	0.049	0.033	0.035	0.031	0.028	0.026
	328	0.049	0.033	0.034	0.031	0.027	0.025
	329	0.049	0.033	0.034	0.03	0.027	0.025
	330	0.049	0.033	0.034	0.03	0.027	0.025
	331	0.049	0.032	0.034	0.03	0.026	0.024
	332	0.048	0.032	0.033	0.03	0.026	0.024
	333	0.048	0.032	0.033	0.029	0.026	0.024
	334	0.048	0.032	0.033	0.029	0.026	0.024
	335	0.048	0.032	0.033	0.029	0.026	0.024
	336	0.048	0.032	0.033	0.029	0.026	0.024
	337	0.048	0.032	0.033	0.029	0.026	0.024
	338	0.048	0.032	0.033	0.029	0.026	0.024
	339	0.048	0.032	0.033	0.029	0.026	0.024
	340	0.048	0.032	0.033	0.029	0.026	0.024
	341	0.048	0.032	0.033	0.029	0.026	0.024
	342	0.048	0.032	0.033	0.029	0.026	0.024
	343	0.048	0.032	0.033	0.029	0.025	0.024
	344	0.048	0.032	0.033	0.029	0.026	0.024
	345	0.048	0.032	0.033	0.029	0.026	0.024
	346	0.048	0.032	0.033	0.029	0.026	0.024
	347	0.048	0.032	0.033	0.029	0.026	0.024
	348	0.048	0.032	0.033	0.029	0.026	0.024
	349	0.048	0.032	0.033	0.029	0.026	0.024
	350	0.049	0.034	0.035	0.031	0.026	0.024
	351	0.049	0.035	0.037	0.033	0.027	0.025
	352	0.049	0.035	0.037	0.033	0.027	0.025
	353	0.049	0.035	0.037	0.033	0.027	0.025
	354	0.049	0.035	0.037	0.033	0.027	0.025
	355	0.049	0.035	0.037	0.033	0.027	0.025
	356	0.049	0.035	0.037	0.033	0.027	0.025
	357	0.048	0.035	0.036	0.033	0.027	0.025
	358	0.049	0.035	0.036	0.032	0.027	0.024
	359	0.048	0.034	0.036	0.032	0.026	0.024
	360	0.048	0.034	0.036	0.032	0.026	0.024
	361	0.048	0.034	0.036	0.032	0.026	0.024
	362	0.048	0.034	0.036	0.032	0.026	0.024
	363	0.047	0.034	0.035	0.032	0.026	0.023
	364	0.047	0.034	0.035	0.031	0.026	0.023
	365	0.047	0.033	0.035	0.031	0.025	0.023
	366	0.047	0.033	0.034	0.031	0.025	0.023
	367	0.046	0.032	0.034	0.03	0.024	0.022
	368	0.046	0.032	0.034	0.03	0.024	0.022
	369	0.045	0.032	0.033	0.029	0.024	0.021
	370	0.045	0.031	0.033	0.029	0.023	0.021
	371	0.045	0.031	0.032	0.029	0.023	0.021
	372	0.044	0.031	0.032	0.028	0.022	0.02
	373	0.044	0.03	0.031	0.028	0.022	0.02
	374	0.043	0.03	0.031	0.027	0.021	0.019
	375	0.042	0.029	0.031	0.027	0.021	0.019
	376	0.042	0.029	0.03	0.026	0.021	0.018
	377	0.042	0.028	0.03	0.026	0.02	0.018
	378	0.041	0.028	0.029	0.025	0.02	0.018
	379	0.04	0.027	0.029	0.025	0.019	0.017
	380	0.04	0.027	0.028	0.024	0.019	0.017
	381	0.039	0.026	0.028	0.024	0.018	0.016
	382	0.039	0.026	0.027	0.023	0.018	0.016
	383	0.038	0.025	0.027	0.023	0.017	0.015
	384	0.038	0.025	0.026	0.023	0.017	0.015
	385	0.037	0.025	0.026	0.022	0.017	0.014
	386	0.037	0.024	0.026	0.022	0.016	0.014
	387	0.036	0.024	0.025	0.021	0.016	0.014
	388	0.035	0.023	0.025	0.021	0.015	0.013
	389	0.035	0.023	0.024	0.02	0.015	0.012
	390	0.034	0.022	0.023	0.02	0.014	0.012
	391	0.034	0.021	0.023	0.019	0.014	0.012
	392	0.033	0.021	0.022	0.019	0.013	0.011
	393	0.032	0.02	0.022	0.018	0.013	0.01
	394	0.032	0.02	0.021	0.018	0.012	0.01
	395	0.031	0.019	0.021	0.017	0.012	0.009
	396	0.03	0.019	0.02	0.016	0.011	0.009
	397	0.03	0.018	0.02	0.016	0.01	0.008
	398	0.029	0.017	0.019	0.015	0.01	0.007
	399	0.029	0.017	0.018	0.014	0.009	0.007
	400	0.028	0.016	0.018	0.014	0.009	0.006
	401	0.027	0.016	0.017	0.013	0.008	0.006
	402	0.027	0.015	0.016	0.013	0.007	0.005
	403	0.026	0.014	0.016	0.012	0.007	0.005
	404	0.026	0.014	0.016	0.012	0.006	0.004
	405	0.025	0.014	0.015	0.011	0.006	0.004
	406	0.025	0.013	0.015	0.011	0.005	0.003
	407	0.024	0.013	0.014	0.011	0.005	0.003
	408	0.024	0.012	0.014	0.01	0.005	0.003
	409	0.024	0.012	0.014	0.01	0.005	0.003
	410	0.023	0.012	0.013	0.01	0.004	0.002
	411	0.023	0.012	0.013	0.009	0.004	0.002
	412	0.023	0.012	0.013	0.009	0.004	0.002
	413	0.023	0.012	0.013	0.009	0.004	0.002
	414	0.022	0.011	0.013	0.009	0.004	0.001
	415	0.022	0.011	0.013	0.009	0.004	0.002
	416	0.022	0.011	0.013	0.009	0.004	0.002
	417	0.022	0.011	0.013	0.009	0.004	0.002
	418	0.022	0.011	0.013	0.009	0.004	0.002
	419	0.022	0.011	0.013	0.009	0.004	0.002
	420	0.022	0.011	0.013	0.009	0.004	0.002
	421	0.022	0.011	0.013	0.009	0.004	0.002
	422	0.023	0.011	0.013	0.009	0.004	0.002
	423	0.023	0.012	0.013	0.009	0.005	0.002
	424	0.023	0.012	0.013	0.01	0.005	0.002
	425	0.023	0.012	0.014	0.01	0.005	0.002
	426	0.023	0.013	0.014	0.01	0.005	0.003
	427	0.024	0.013	0.014	0.01	0.006	0.003
	428	0.024	0.013	0.015	0.011	0.006	0.003
	429	0.024	0.013	0.015	0.011	0.006	0.004
	430	0.025	0.014	0.015	0.012	0.007	0.004
	431	0.025	0.014	0.016	0.012	0.007	0.005
	432	0.026	0.015	0.016	0.013	0.008	0.005
	433	0.026	0.016	0.017	0.013	0.008	0.006
	434	0.027	0.016	0.017	0.014	0.009	0.007
	435	0.027	0.017	0.018	0.014	0.01	0.007
	436	0.028	0.017	0.019	0.015	0.01	0.008
	437	0.028	0.018	0.02	0.016	0.011	0.009
	438	0.029	0.019	0.02	0.017	0.012	0.009
	439	0.03	0.02	0.021	0.017	0.012	0.01
	440	0.031	0.02	0.022	0.018	0.013	0.011
	441	0.031	0.021	0.022	0.019	0.014	0.012
	442	0.032	0.022	0.023	0.02	0.015	0.012
	443	0.033	0.023	0.024	0.02	0.015	0.013
	444	0.033	0.023	0.025	0.021	0.016	0.014
	445	0.034	0.024	0.025	0.022	0.017	0.014
	446	0.035	0.025	0.026	0.023	0.018	0.015
	447	0.036	0.026	0.027	0.024	0.019	0.016
	448	0.037	0.027	0.028	0.025	0.02	0.017
	449	0.038	0.028	0.029	0.026	0.021	0.018
	450	0.039	0.029	0.031	0.027	0.022	0.02
	451	0.04	0.031	0.032	0.028	0.023	0.021
	452	0.042	0.032	0.033	0.03	0.025	0.022
	453	0.043	0.034	0.035	0.031	0.026	0.024
	454	0.045	0.035	0.036	0.033	0.028	0.025
	455	0.047	0.037	0.038	0.035	0.03	0.027
	456	0.049	0.039	0.04	0.037	0.032	0.029
	457	0.051	0.041	0.042	0.039	0.034	0.031
	458	0.053	0.043	0.045	0.041	0.036	0.034
	459	0.056	0.046	0.047	0.044	0.039	0.036
	460	0.058	0.049	0.05	0.046	0.042	0.039
	461	0.062	0.052	0.053	0.05	0.045	0.042
	462	0.065	0.055	0.056	0.053	0.048	0.045
	463	0.068	0.059	0.06	0.056	0.052	0.049
	464	0.072	0.062	0.063	0.06	0.055	0.052
	465	0.076	0.066	0.067	0.064	0.059	0.056
	466	0.079	0.069	0.071	0.067	0.062	0.059
	467	0.083	0.073	0.074	0.071	0.066	0.063
	468	0.086	0.076	0.077	0.074	0.069	0.066
	469	0.089	0.079	0.08	0.077	0.072	0.069
	470	0.092	0.082	0.083	0.08	0.075	0.072
	471	0.094	0.085	0.086	0.083	0.078	0.075
	472	0.097	0.087	0.088	0.085	0.08	0.077
	473	0.098	0.089	0.09	0.087	0.082	0.079
	474	0.1	0.091	0.092	0.089	0.084	0.081
	475	0.102	0.093	0.094	0.091	0.086	0.082
	476	0.104	0.094	0.095	0.092	0.087	0.084
	477	0.106	0.096	0.097	0.094	0.089	0.086
	478	0.108	0.099	0.1	0.097	0.092	0.089
	479	0.111	0.102	0.103	0.099	0.094	0.091
	480	0.115	0.105	0.106	0.103	0.098	0.095
	481	0.119	0.109	0.11	0.107	0.102	0.099
	482	0.124	0.114	0.115	0.112	0.107	0.104
	483	0.129	0.119	0.12	0.117	0.112	0.109
	484	0.136	0.126	0.127	0.124	0.119	0.115
	485	0.143	0.133	0.134	0.131	0.126	0.123
	486	0.152	0.142	0.143	0.14	0.135	0.131
	487	0.161	0.151	0.151	0.149	0.143	0.14
	488	0.17	0.161	0.161	0.159	0.153	0.15
	489	0.182	0.172	0.173	0.17	0.165	0.161
	490	0.194	0.184	0.185	0.182	0.177	0.173
	491	0.208	0.198	0.198	0.196	0.191	0.186
	492	0.223	0.214	0.214	0.211	0.206	0.202
	493	0.239	0.229	0.229	0.227	0.222	0.217
	494	0.256	0.246	0.246	0.244	0.239	0.234
	495	0.274	0.264	0.264	0.262	0.257	0.252
	496	0.292	0.283	0.283	0.281	0.276	0.27
	497	0.309	0.301	0.3	0.298	0.293	0.287
	498	0.324	0.316	0.315	0.313	0.308	0.302
	499	0.337	0.329	0.328	0.327	0.321	0.315
	500	0.346	0.338	0.338	0.336	0.331	0.325
	501	0.351	0.343	0.342	0.34	0.335	0.329
	502	0.35	0.342	0.341	0.34	0.334	0.329
	503	0.344	0.335	0.335	0.333	0.328	0.323
	504	0.333	0.324	0.324	0.323	0.317	0.312
	505	0.318	0.309	0.309	0.308	0.302	0.298
	506	0.299	0.29	0.29	0.288	0.283	0.279
	507	0.278	0.268	0.269	0.266	0.261	0.258
	508	0.257	0.246	0.247	0.245	0.24	0.236
	509	0.234	0.223	0.224	0.222	0.216	0.213
	510	0.211	0.201	0.201	0.199	0.193	0.19
	511	0.19	0.18	0.181	0.178	0.173	0.17
	512	0.172	0.161	0.162	0.159	0.154	0.151
	513	0.154	0.143	0.144	0.141	0.136	0.133
	514	0.138	0.127	0.129	0.125	0.12	0.117
	515	0.125	0.113	0.115	0.111	0.106	0.103
	516	0.112	0.101	0.103	0.099	0.093	0.091
	517	0.102	0.09	0.092	0.088	0.083	0.08
	518	0.093	0.082	0.084	0.079	0.074	0.071
	519	0.085	0.074	0.076	0.072	0.066	0.063
	520	0.079	0.068	0.069	0.065	0.06	0.057
	521	0.073	0.062	0.064	0.059	0.054	0.051
	522	0.069	0.058	0.059	0.055	0.049	0.046
	523	0.064	0.054	0.055	0.051	0.045	0.042
	524	0.061	0.05	0.052	0.047	0.042	0.039
	525	0.058	0.048	0.049	0.044	0.039	0.036
	526	0.056	0.045	0.047	0.042	0.037	0.034
	527	0.054	0.043	0.045	0.04	0.034	0.031
	528	0.052	0.041	0.043	0.038	0.033	0.029
	529	0.05	0.04	0.041	0.036	0.031	0.028
	530	0.049	0.038	0.04	0.035	0.029	0.026
	531	0.047	0.037	0.039	0.034	0.028	0.025
	532	0.046	0.036	0.038	0.032	0.027	0.024
	533	0.045	0.035	0.037	0.031	0.026	0.023
	534	0.044	0.034	0.036	0.03	0.025	0.022
	535	0.043	0.033	0.035	0.029	0.024	0.021
	536	0.042	0.032	0.034	0.028	0.023	0.02
	537	0.041	0.031	0.033	0.028	0.022	0.019
	538	0.04	0.03	0.032	0.027	0.021	0.018
	539	0.039	0.029	0.031	0.026	0.02	0.017
	540	0.038	0.029	0.03	0.025	0.02	0.016
	541	0.037	0.028	0.03	0.024	0.019	0.016
	542	0.036	0.027	0.029	0.023	0.018	0.015
	543	0.036	0.026	0.028	0.023	0.017	0.014
	544	0.035	0.025	0.027	0.022	0.016	0.013
	545	0.034	0.025	0.027	0.021	0.016	0.012
	546	0.033	0.024	0.026	0.02	0.015	0.012
	547	0.032	0.023	0.025	0.019	0.014	0.011
	548	0.031	0.022	0.024	0.019	0.013	0.01
	549	0.03	0.022	0.024	0.018	0.013	0.009
	550	0.03	0.021	0.023	0.017	0.012	0.009
	551	0.029	0.02	0.022	0.017	0.011	0.008
	552	0.028	0.019	0.021	0.016	0.01	0.007
	553	0.027	0.019	0.021	0.015	0.01	0.007
	554	0.027	0.018	0.02	0.014	0.009	0.006
	555	0.026	0.018	0.02	0.014	0.008	0.005
	556	0.025	0.017	0.019	0.013	0.008	0.005
	557	0.025	0.016	0.018	0.013	0.007	0.004
	558	0.024	0.016	0.018	0.012	0.007	0.004
	559	0.023	0.015	0.017	0.012	0.006	0.003
	560	0.023	0.015	0.017	0.011	0.006	0.003
	561	0.022	0.014	0.016	0.01	0.005	0.002
	562	0.022	0.014	0.016	0.01	0.005	0.001
	563	0.021	0.013	0.015	0.009	0.004	0.001
	564	0.021	0.013	0.015	0.009	0.004	0.001
	565	0.02	0.012	0.014	0.009	0.003	0
	566	0.02	0.012	0.014	0.008	0.003	0
	567	0.019	0.012	0.014	0.008	0.003	0
	568	0.019	0.011	0.013	0.007	0.002	-0.001
	569	0.018	0.011	0.013	0.007	0.002	-0.001
	570	0.018	0.01	0.012	0.007	0.002	-0.002
	571	0.018	0.01	0.012	0.006	0.001	-0.002
	572	0.017	0.01	0.012	0.006	0.001	-0.002
	573	0.017	0.009	0.012	0.006	0.001	-0.003
	574	0.017	0.009	0.011	0.006	0	-0.003
	575	0.016	0.009	0.011	0.005	0	-0.003
	576	0.016	0.009	0.011	0.005	0	-0.003
	577	0.016	0.009	0.011	0.005	0	-0.003
	578	0.016	0.008	0.01	0.005	-0.001	-0.004
	579	0.015	0.008	0.01	0.004	-0.001	-0.004
	580	0.015	0.008	0.01	0.004	-0.001	-0.004
	581	0.015	0.008	0.01	0.004	-0.001	-0.004
	582	0.015	0.008	0.01	0.004	-0.001	-0.005
	583	0.015	0.007	0.01	0.004	-0.001	-0.005
	584	0.015	0.007	0.009	0.004	-0.002	-0.005
	585	0.014	0.007	0.009	0.003	-0.002	-0.005
	586	0.014	0.007	0.009	0.003	-0.002	-0.005
	587	0.014	0.007	0.009	0.003	-0.002	-0.005
	588	0.014	0.007	0.009	0.003	-0.002	-0.005
	589	0.014	0.007	0.009	0.003	-0.002	-0.005
	590	0.014	0.007	0.009	0.003	-0.002	-0.005
	591	0.014	0.007	0.009	0.003	-0.002	-0.005
	592	0.013	0.006	0.009	0.003	-0.002	-0.006
	593	0.013	0.006	0.008	0.003	-0.002	-0.006
	594	0.013	0.006	0.008	0.003	-0.003	-0.006
	595	0.013	0.006	0.008	0.002	-0.003	-0.006
	596	0.013	0.006	0.008	0.002	-0.003	-0.006
	597	0.013	0.006	0.008	0.002	-0.003	-0.006
	598	0.013	0.006	0.008	0.002	-0.003	-0.006
	599	0.013	0.006	0.008	0.002	-0.003	-0.006
	600	0.013	0.006	0.008	0.002	-0.003	-0.006
	601	0.013	0.006	0.008	0.002	-0.003	-0.006
	602	0.013	0.006	0.008	0.002	-0.003	-0.006
	603	0.013	0.006	0.008	0.002	-0.003	-0.006
	604	0.013	0.006	0.008	0.002	-0.003	-0.006
	605	0.013	0.006	0.008	0.002	-0.003	-0.006
	606	0.013	0.006	0.008	0.002	-0.003	-0.006
	607	0.013	0.006	0.008	0.002	-0.003	-0.006
	608	0.013	0.006	0.008	0.002	-0.003	-0.006
	609	0.013	0.006	0.008	0.002	-0.003	-0.006
	610	0.012	0.006	0.008	0.002	-0.003	-0.006
	611	0.012	0.006	0.008	0.002	-0.003	-0.006
	612	0.012	0.006	0.008	0.002	-0.003	-0.006
	613	0.012	0.006	0.008	0.002	-0.003	-0.006
	614	0.012	0.006	0.008	0.002	-0.003	-0.007
	615	0.012	0.006	0.008	0.002	-0.003	-0.007
	616	0.012	0.006	0.008	0.002	-0.003	-0.007
	617	0.012	0.006	0.007	0.002	-0.003	-0.007
	618	0.012	0.006	0.008	0.002	-0.003	-0.006
	619	0.012	0.006	0.008	0.002	-0.003	-0.006
	620	0.012	0.006	0.008	0.002	-0.003	-0.006
	621	0.012	0.006	0.008	0.002	-0.003	-0.006
	622	0.012	0.006	0.008	0.002	-0.003	-0.006
	623	0.012	0.006	0.008	0.002	-0.003	-0.006
	624	0.012	0.006	0.008	0.002	-0.003	-0.006
	625	0.012	0.006	0.008	0.002	-0.003	-0.006
	626	0.012	0.006	0.008	0.002	-0.003	-0.006
	627	0.012	0.006	0.008	0.002	-0.003	-0.006
	628	0.012	0.006	0.008	0.002	-0.003	-0.007
	629	0.012	0.006	0.008	0.002	-0.003	-0.007
	630	0.012	0.006	0.008	0.002	-0.003	-0.007
	631	0.012	0.006	0.008	0.002	-0.003	-0.006
	632	0.012	0.006	0.008	0.002	-0.003	-0.007
	633	0.012	0.006	0.008	0.002	-0.003	-0.007
	634	0.012	0.006	0.008	0.002	-0.003	-0.006
	635	0.012	0.006	0.008	0.002	-0.003	-0.006
	636	0.012	0.006	0.008	0.002	-0.003	-0.006
	637	0.012	0.006	0.008	0.002	-0.003	-0.007
	638	0.012	0.006	0.007	0.002	-0.003	-0.007
	639	0.012	0.006	0.007	0.002	-0.003	-0.007
	640	0.012	0.006	0.007	0.002	-0.003	-0.007
	641	0.012	0.006	0.007	0.002	-0.003	-0.007
	642	0.012	0.006	0.007	0.002	-0.003	-0.007
	643	0.012	0.006	0.007	0.002	-0.003	-0.007
	644	0.012	0.005	0.007	0.002	-0.003	-0.007
	645	0.012	0.006	0.007	0.002	-0.003	-0.007
	646	0.012	0.005	0.007	0.002	-0.003	-0.007
	647	0.012	0.005	0.007	0.002	-0.003	-0.007
	648	0.012	0.005	0.007	0.002	-0.003	-0.007
	649	0.012	0.005	0.007	0.002	-0.003	-0.007
	650	0.012	0.005	0.007	0.002	-0.003	-0.007
	651	0.012	0.005	0.007	0.001	-0.003	-0.007
	652	0.012	0.005	0.007	0.002	-0.003	-0.007
	653	0.012	0.005	0.007	0.002	-0.003	-0.006
	654	0.012	0.005	0.007	0.002	-0.003	-0.006
	655	0.012	0.005	0.007	0.002	-0.003	-0.006
	656	0.012	0.005	0.007	0.002	-0.003	-0.006
	657	0.012	0.005	0.007	0.002	-0.003	-0.007
	658	0.012	0.005	0.007	0.002	-0.003	-0.006
	659	0.012	0.005	0.007	0.002	-0.003	-0.007
	660	0.012	0.005	0.007	0.002	-0.003	-0.006
	661	0.012	0.006	0.007	0.002	-0.003	-0.006
	662	0.012	0.005	0.007	0.002	-0.003	-0.007
	663	0.011	0.006	0.007	0.002	-0.003	-0.006
	664	0.012	0.005	0.007	0.002	-0.003	-0.006
	665	0.012	0.005	0.007	0.002	-0.003	-0.006
	666	0.011	0.005	0.007	0.002	-0.003	-0.006
	667	0.011	0.005	0.007	0.002	-0.003	-0.006
	668	0.011	0.005	0.007	0.002	-0.003	-0.006
	669	0.012	0.006	0.007	0.002	-0.003	-0.006
	670	0.012	0.006	0.007	0.002	-0.003	-0.006
	671	0.011	0.006	0.007	0.002	-0.003	-0.006
	672	0.011	0.006	0.007	0.002	-0.003	-0.006
	673	0.011	0.005	0.007	0.002	-0.003	-0.006
	674	0.011	0.006	0.007	0.002	-0.003	-0.006
	675	0.011	0.005	0.007	0.002	-0.003	-0.006
	676	0.011	0.006	0.007	0.002	-0.003	-0.006
	677	0.011	0.006	0.007	0.002	-0.003	-0.006
	678	0.011	0.006	0.007	0.002	-0.003	-0.006
	679	0.011	0.006	0.007	0.002	-0.003	-0.006
	680	0.011	0.006	0.007	0.002	-0.003	-0.006
	681	0.011	0.006	0.007	0.002	-0.003	-0.006
	682	0.011	0.005	0.007	0.002	-0.003	-0.006
	683	0.011	0.006	0.007	0.002	-0.003	-0.006
	684	0.011	0.005	0.007	0.002	-0.003	-0.006
	685	0.011	0.005	0.007	0.002	-0.003	-0.006
	686	0.011	0.006	0.007	0.002	-0.003	-0.006
	687	0.011	0.006	0.007	0.002	-0.003	-0.007
	688	0.011	0.006	0.007	0.002	-0.003	-0.006
	689	0.011	0.006	0.007	0.002	-0.003	-0.006
	690	0.011	0.006	0.007	0.002	-0.003	-0.006
	691	0.011	0.005	0.007	0.002	-0.003	-0.006
	692	0.011	0.006	0.007	0.002	-0.003	-0.006
	693	0.011	0.006	0.007	0.002	-0.003	-0.006
	694	0.011	0.006	0.007	0.002	-0.003	-0.007
	695	0.011	0.006	0.007	0.002	-0.003	-0.006
	696	0.011	0.005	0.007	0.002	-0.003	-0.007
	697	0.011	0.006	0.007	0.002	-0.003	-0.007
	698	0.011	0.005	0.007	0.002	-0.003	-0.007
	699	0.011	0.006	0.007	0.002	-0.003	-0.007
	700	0.011	0.006	0.007	0.002	-0.003	-0.006
	701	0.011	0.006	0.007	0.002	-0.003	-0.006
	702	0.011	0.006	0.007	0.002	-0.003	-0.006
	703	0.011	0.006	0.007	0.002	-0.003	-0.006
	704	0.011	0.005	0.007	0.002	-0.003	-0.006
	705	0.011	0.005	0.007	0.002	-0.003	-0.007
	706	0.011	0.005	0.007	0.002	-0.003	-0.007
	707	0.011	0.006	0.007	0.002	-0.003	-0.006
	708	0.011	0.006	0.007	0.002	-0.003	-0.006
	709	0.011	0.006	0.007	0.002	-0.003	-0.006
	710	0.011	0.006	0.007	0.002	-0.003	-0.006
	711	0.01	0.006	0.007	0.002	-0.003	-0.006
	712	0.01	0.005	0.007	0.002	-0.003	-0.007
	713	0.01	0.006	0.007	0.002	-0.003	-0.006
	714	0.01	0.006	0.007	0.002	-0.003	-0.006
	715	0.01	0.006	0.007	0.002	-0.003	-0.007
	716	0.01	0.006	0.007	0.002	-0.003	-0.006
	717	0.01	0.006	0.007	0.002	-0.003	-0.006
	718	0.01	0.006	0.007	0.002	-0.003	-0.006
	719	0.01	0.006	0.007	0.002	-0.003	-0.006
	720	0.01	0.006	0.007	0.002	-0.003	-0.006
	721	0.01	0.006	0.007	0.002	-0.003	-0.006
	722	0.01	0.006	0.007	0.002	-0.003	-0.006
	723	0.01	0.006	0.007	0.002	-0.003	-0.006
	724	0.01	0.005	0.007	0.002	-0.003	-0.006
	725	0.01	0.006	0.007	0.002	-0.003	-0.006
	726	0.01	0.006	0.007	0.002	-0.003	-0.006
	727	0.01	0.006	0.007	0.002	-0.003	-0.006
	728	0.01	0.006	0.007	0.002	-0.003	-0.006
	729	0.01	0.006	0.007	0.002	-0.003	-0.006
	730	0.01	0.006	0.007	0.002	-0.003	-0.006
	731	0.01	0.006	0.007	0.002	-0.003	-0.006
	732	0.01	0.006	0.007	0.002	-0.003	-0.006
	733	0.01	0.006	0.007	0.002	-0.003	-0.006
	734	0.01	0.006	0.007	0.002	-0.003	-0.006
	735	0.01	0.006	0.007	0.002	-0.003	-0.006
	736	0.01	0.006	0.007	0.002	-0.003	-0.006
	737	0.01	0.006	0.007	0.002	-0.003	-0.006
	738	0.01	0.006	0.007	0.002	-0.003	-0.006
	739	0.01	0.006	0.007	0.002	-0.003	-0.006
	740	0.01	0.006	0.007	0.002	-0.003	-0.006
	741	0.01	0.006	0.007	0.002	-0.003	-0.006
	742	0.01	0.006	0.007	0.002	-0.003	-0.006
	743	0.01	0.006	0.007	0.002	-0.003	-0.006
	744	0.01	0.006	0.007	0.002	-0.003	-0.006
	745	0.01	0.006	0.007	0.002	-0.003	-0.006
	746	0.01	0.006	0.007	0.002	-0.003	-0.006
	747	0.01	0.006	0.007	0.002	-0.003	-0.006
	748	0.01	0.006	0.007	0.002	-0.003	-0.006
	749	0.01	0.006	0.007	0.002	-0.003	-0.006
	750	0.01	0.006	0.007	0.002	-0.003	-0.006
	751	0.01	0.005	0.007	0.002	-0.003	-0.006
	752	0.01	0.006	0.007	0.002	-0.003	-0.006
	753	0.01	0.006	0.007	0.002	-0.003	-0.006
	754	0.01	0.006	0.007	0.002	-0.003	-0.006
	755	0.01	0.006	0.007	0.002	-0.003	-0.006
	756	0.01	0.006	0.007	0.002	-0.003	-0.006
	757	0.01	0.005	0.007	0.002	-0.003	-0.006
	758	0.009	0.005	0.007	0.002	-0.003	-0.006
	759	0.009	0.005	0.007	0.002	-0.004	-0.006
	760	0.009	0.005	0.007	0.002	-0.003	-0.006
	761	0.009	0.006	0.007	0.002	-0.003	-0.006
	762	0.009	0.006	0.007	0.002	-0.003	-0.006
	763	0.009	0.006	0.007	0.002	-0.003	-0.006
	764	0.009	0.005	0.007	0.002	-0.003	-0.006
	765	0.009	0.005	0.007	0.002	-0.003	-0.006
	766	0.009	0.006	0.007	0.002	-0.003	-0.006
	767	0.009	0.006	0.007	0.002	-0.003	-0.006
	768	0.009	0.005	0.007	0.002	-0.004	-0.006
	769	0.009	0.005	0.007	0.002	-0.003	-0.006
	770	0.009	0.005	0.007	0.002	-0.004	-0.006
	771	0.009	0.005	0.007	0.002	-0.004	-0.006
	772	0.009	0.005	0.007	0.002	-0.004	-0.007
	773	0.009	0.005	0.007	0.002	-0.003	-0.006
	774	0.009	0.005	0.007	0.002	-0.003	-0.006
	775	0.009	0.006	0.007	0.002	-0.003	-0.006
	776	0.009	0.005	0.007	0.002	-0.003	-0.006
	777	0.009	0.005	0.007	0.002	-0.003	-0.007
	778	0.009	0.005	0.007	0.002	-0.003	-0.006
	779	0.009	0.005	0.007	0.002	-0.003	-0.006
	780	0.009	0.005	0.007	0.002	-0.003	-0.006
	781	0.009	0.005	0.007	0.002	-0.003	-0.006
	782	0.009	0.005	0.007	0.002	-0.003	-0.006
	783	0.009	0.005	0.007	0.002	-0.003	-0.006
	784	0.009	0.005	0.007	0.002	-0.003	-0.006
	785	0.008	0.005	0.007	0.002	-0.004	-0.006
	786	0.008	0.005	0.007	0.001	-0.004	-0.007
	787	0.009	0.005	0.007	0.001	-0.004	-0.006
	788	0.008	0.005	0.007	0.002	-0.004	-0.007
	789	0.008	0.005	0.007	0.001	-0.004	-0.007
	790	0.008	0.005	0.007	0.001	-0.004	-0.006
	791	0.008	0.005	0.007	0.002	-0.003	-0.006
	792	0.008	0.005	0.007	0.001	-0.003	-0.007
	793	0.008	0.005	0.007	0.001	-0.003	-0.007
	794	0.008	0.005	0.007	0.001	-0.003	-0.007
	795	0.008	0.005	0.007	0.001	-0.003	-0.007
	796	0.008	0.005	0.007	0.001	-0.003	-0.007
	797	0.008	0.005	0.007	0.001	-0.004	-0.007
	798	0.008	0.005	0.007	0.001	-0.003	-0.007
	799	0.008	0.005	0.007	0.001	-0.003	-0.007
	800	0.008	0.005	0.007	0.001	-0.003	-0.007

## Sheet: Fig 3B
	Spectrophotometric studies ss-ctDNA
	Wavenumber	Absorbance
	nm	a.u.
	200	0.171	0.178	1561	2463	2968
	201	0.169	0.171	1529	2414	2948
	202	0.166	0.162	1491	2353	2843
	203	0.161	0.153	1446	2.3	2.78
	204	0.155	0.144	1399	2221	2694
	205	0.147	0.133	1349	2149	2622
	206	0.138	0.122	1.3	2075	2.55
	207	0.129	0.111	1249	1996	2441
	208	0.121	0.102	1198	1918	2355
	209	0.115	0.095	1151	1843	2264
	210	0.111	0.089	1104	1767	2173
	211	0.107	0.085	1057	1692	2084
	212	0.105	0.082	1011	1618	1994
	213	0.103	0.079	0.962	1.54	1899
	214	0.102	0.077	0.912	1456	1796
	215	0.1	0.076	0.861	1374	1694
	216	0.099	0.075	0.811	1294	1595
	217	0.099	0.074	0.76	1.21	1493
	218	0.098	0.072	0.708	1125	1386
	219	0.097	0.071	0.658	1044	1284
	220	0.096	0.07	0.611	0.967	1.19
	221	0.095	0.068	0.566	0.895	1102
	222	0.093	0.067	0.528	0.834	1028
	223	0.092	0.065	0.497	0.785	0.968
	224	0.091	0.064	0.471	0.744	0.918
	225	0.09	0.063	0.45	0.712	0.879
	226	0.089	0.062	0.434	0.688	0.85
	227	0.088	0.062	0.422	0.669	0.827
	228	0.088	0.061	0.412	0.656	0.812
	229	0.087	0.06	0.406	0.648	0.803
	230	0.086	0.06	0.404	0.645	0.8
	231	0.085	0.058	0.403	0.646	0.803
	232	0.083	0.057	0.406	0.653	0.811
	233	0.081	0.055	0.412	0.664	0.826
	234	0.079	0.054	0.42	0.68	0.847
	235	0.078	0.052	0.432	0.701	0.873
	236	0.076	0.051	0.446	0.727	0.906
	237	0.075	0.05	0.464	0.756	0.942
	238	0.074	0.049	0.483	0.79	0.984
	239	0.073	0.049	0.505	0.826	1028
	240	0.073	0.048	0.529	0.865	1077
	241	0.072	0.048	0.554	0.907	1129
	242	0.072	0.048	0.58	0.951	1184
	243	0.072	0.048	0.608	0.997	1.24
	244	0.072	0.048	0.636	1044	1297
	245	0.072	0.048	0.665	1091	1357
	246	0.072	0.048	0.694	1139	1417
	247	0.072	0.048	0.723	1185	1473
	248	0.072	0.049	0.75	1229	1527
	249	0.073	0.049	0.776	1273	1579
	250	0.073	0.049	0.8	1313	1627
	251	0.072	0.049	0.823	1.35	1673
	252	0.072	0.049	0.842	1381	1711
	253	0.072	0.049	0.859	1.41	1746
	254	0.072	0.049	0.874	1434	1774
	255	0.072	0.049	0.887	1454	1801
	256	0.072	0.049	0.897	1.47	1822
	257	0.072	0.049	0.905	1482	1835
	258	0.072	0.049	0.909	1489	1843
	259	0.072	0.05	0.91	1489	1842
	260	0.072	0.05	0.908	1485	1838
	261	0.073	0.05	0.903	1477	1824
	262	0.073	0.051	0.896	1463	1808
	263	0.073	0.051	0.887	1449	1.79
	264	0.073	0.051	0.878	1433	1772
	265	0.074	0.052	0.867	1414	1747
	266	0.074	0.052	0.855	1395	1722
	267	0.073	0.052	0.842	1373	1694
	268	0.073	0.051	0.827	1347	1.66
	269	0.073	0.051	0.809	1317	1625
	270	0.073	0.051	0.79	1284	1584
	271	0.072	0.051	0.769	1249	1541
	272	0.072	0.051	0.746	1.21	1492
	273	0.071	0.05	0.721	1.17	1441
	274	0.071	0.049	0.697	1128	1391
	275	0.07	0.049	0.67	1084	1338
	276	0.069	0.049	0.645	1042	1285
	277	0.069	0.048	0.618	0.997	1228
	278	0.068	0.047	0.59	0.95	1.17
	279	0.067	0.046	0.561	0.904	1112
	280	0.066	0.046	0.533	0.856	1053
	281	0.065	0.045	0.503	0.806	0.992
	282	0.064	0.044	0.473	0.756	0.929
	283	0.063	0.043	0.442	0.705	0.866
	284	0.062	0.042	0.411	0.654	0.803
	285	0.061	0.041	0.381	0.605	0.743
	286	0.06	0.04	0.351	0.555	0.681
	287	0.059	0.039	0.322	0.507	0.621
	288	0.058	0.038	0.293	0.461	0.564
	289	0.057	0.037	0.266	0.415	0.508
	290	0.056	0.037	0.238	0.371	0.453
	291	0.055	0.036	0.213	0.329	0.402
	292	0.055	0.035	0.189	0.29	0.354
	293	0.054	0.035	0.167	0.253	0.309
	294	0.053	0.034	0.146	0.22	0.269
	295	0.052	0.034	0.128	0.191	0.233
	296	0.052	0.033	0.111	0.164	0.2
	297	0.052	0.033	0.096	0.141	0.172
	298	0.052	0.033	0.084	0.121	0.149
	299	0.052	0.033	0.073	0.104	0.128
	300	0.052	0.034	0.063	0.089	0.11
	301	0.052	0.034	0.055	0.076	0.095
	302	0.053	0.034	0.049	0.066	0.083
	303	0.053	0.035	0.044	0.058	0.074
	304	0.053	0.035	0.04	0.052	0.066
	305	0.054	0.036	0.037	0.048	0.061
	306	0.055	0.036	0.033	0.044	0.058
	307	0.055	0.037	0.031	0.041	0.055
	308	0.055	0.037	0.03	0.039	0.053
	309	0.055	0.037	0.029	0.037	0.051
	310	0.055	0.037	0.028	0.036	0.049
	311	0.055	0.037	0.027	0.035	0.048
	312	0.055	0.037	0.026	0.034	0.047
	313	0.054	0.036	0.025	0.033	0.045
	314	0.054	0.036	0.025	0.032	0.044
	315	0.054	0.036	0.024	0.031	0.044
	316	0.053	0.035	0.024	0.03	0.043
	317	0.053	0.035	0.023	0.029	0.042
	318	0.052	0.035	0.023	0.029	0.041
	319	0.052	0.035	0.022	0.029	0.041
	320	0.051	0.034	0.022	0.028	0.04
	321	0.051	0.034	0.021	0.027	0.04
	322	0.051	0.034	0.021	0.027	0.039
	323	0.051	0.033	0.021	0.026	0.039
	324	0.05	0.033	0.02	0.026	0.038
	325	0.05	0.033	0.02	0.026	0.038
	326	0.049	0.033	0.02	0.026	0.038
	327	0.049	0.032	0.02	0.025	0.037
	328	0.049	0.032	0.019	0.025	0.037
	329	0.049	0.032	0.019	0.025	0.037
	330	0.049	0.032	0.019	0.025	0.037
	331	0.049	0.032	0.019	0.024	0.036
	332	0.048	0.032	0.019	0.024	0.036
	333	0.048	0.032	0.019	0.024	0.036
	334	0.048	0.032	0.018	0.024	0.036
	335	0.048	0.032	0.018	0.024	0.036
	336	0.048	0.032	0.018	0.024	0.036
	337	0.048	0.032	0.018	0.024	0.035
	338	0.048	0.032	0.018	0.024	0.036
	339	0.048	0.032	0.018	0.024	0.035
	340	0.048	0.032	0.018	0.024	0.036
	341	0.048	0.032	0.018	0.024	0.036
	342	0.048	0.032	0.018	0.024	0.036
	343	0.048	0.032	0.018	0.024	0.035
	344	0.048	0.032	0.018	0.024	0.036
	345	0.048	0.032	0.019	0.024	0.036
	346	0.048	0.032	0.019	0.024	0.036
	347	0.048	0.032	0.019	0.024	0.035
	348	0.048	0.032	0.018	0.024	0.035
	349	0.048	0.032	0.018	0.024	0.035
	350	0.049	0.032	0.021	0.026	0.038
	351	0.049	0.032	0.023	0.029	0.04
	352	0.049	0.032	0.023	0.029	0.039
	353	0.049	0.032	0.023	0.029	0.039
	354	0.049	0.032	0.023	0.029	0.039
	355	0.049	0.032	0.023	0.029	0.039
	356	0.049	0.032	0.023	0.029	0.039
	357	0.048	0.032	0.023	0.029	0.039
	358	0.049	0.032	0.023	0.029	0.039
	359	0.048	0.031	0.022	0.028	0.039
	360	0.048	0.031	0.022	0.028	0.038
	361	0.048	0.031	0.022	0.028	0.038
	362	0.048	0.031	0.022	0.028	0.038
	363	0.047	0.031	0.022	0.028	0.038
	364	0.047	0.031	0.022	0.027	0.038
	365	0.047	0.03	0.022	0.027	0.037
	366	0.047	0.03	0.021	0.027	0.037
	367	0.046	0.029	0.021	0.026	0.036
	368	0.046	0.029	0.021	0.026	0.036
	369	0.045	0.029	0.02	0.025	0.035
	370	0.045	0.028	0.02	0.025	0.035
	371	0.045	0.028	0.019	0.025	0.035
	372	0.044	0.027	0.019	0.024	0.034
	373	0.044	0.027	0.018	0.024	0.034
	374	0.043	0.026	0.018	0.023	0.033
	375	0.042	0.026	0.018	0.023	0.033
	376	0.042	0.026	0.017	0.022	0.032
	377	0.042	0.025	0.017	0.022	0.032
	378	0.041	0.025	0.016	0.021	0.031
	379	0.04	0.024	0.016	0.021	0.031
	380	0.04	0.024	0.015	0.02	0.03
	381	0.039	0.023	0.015	0.02	0.03
	382	0.039	0.023	0.014	0.019	0.029
	383	0.038	0.022	0.014	0.019	0.029
	384	0.038	0.022	0.013	0.018	0.028
	385	0.037	0.022	0.013	0.018	0.028
	386	0.037	0.021	0.013	0.018	0.027
	387	0.036	0.02	0.012	0.017	0.027
	388	0.035	0.02	0.012	0.017	0.026
	389	0.035	0.019	0.011	0.016	0.026
	390	0.034	0.019	0.011	0.016	0.025
	391	0.034	0.018	0.01	0.015	0.025
	392	0.033	0.018	0.009	0.014	0.024
	393	0.032	0.017	0.009	0.014	0.024
	394	0.032	0.017	0.009	0.013	0.023
	395	0.031	0.016	0.008	0.013	0.023
	396	0.03	0.015	0.007	0.012	0.022
	397	0.03	0.015	0.007	0.011	0.021
	398	0.029	0.014	0.006	0.011	0.021
	399	0.029	0.013	0.005	0.01	0.02
	400	0.028	0.013	0.005	0.009	0.019
	401	0.027	0.012	0.004	0.009	0.019
	402	0.027	0.012	0.004	0.008	0.018
	403	0.026	0.011	0.003	0.008	0.017
	404	0.026	0.011	0.003	0.007	0.017
	405	0.025	0.01	0.002	0.007	0.016
	406	0.025	0.01	0.002	0.006	0.016
	407	0.024	0.01	0.002	0.006	0.016
	408	0.024	0.009	0.001	0.006	0.015
	409	0.024	0.009	0.001	0.005	0.015
	410	0.023	0.009	0.001	0.005	0.015
	411	0.023	0.009	0.001	0.005	0.015
	412	0.023	0.008	0.001	0.005	0.015
	413	0.023	0.008	0.001	0.005	0.015
	414	0.022	0.008	0	0.005	0.014
	415	0.022	0.008	0	0.005	0.014
	416	0.022	0.008	0	0.005	0.014
	417	0.022	0.008	0	0.005	0.014
	418	0.022	0.008	0	0.005	0.014
	419	0.022	0.008	0	0.005	0.014
	420	0.022	0.008	0.001	0.005	0.014
	421	0.022	0.008	0.001	0.005	0.014
	422	0.023	0.008	0.001	0.005	0.014
	423	0.023	0.009	0.001	0.005	0.015
	424	0.023	0.009	0.001	0.006	0.015
	425	0.023	0.009	0.001	0.006	0.015
	426	0.023	0.009	0.002	0.006	0.015
	427	0.024	0.01	0.002	0.006	0.016
	428	0.024	0.01	0.002	0.007	0.016
	429	0.024	0.01	0.003	0.007	0.017
	430	0.025	0.01	0.003	0.008	0.017
	431	0.025	0.011	0.004	0.008	0.018
	432	0.026	0.012	0.004	0.009	0.018
	433	0.026	0.012	0.005	0.009	0.019
	434	0.027	0.013	0.005	0.01	0.019
	435	0.027	0.013	0.006	0.011	0.02
	436	0.028	0.014	0.007	0.011	0.021
	437	0.028	0.015	0.007	0.012	0.022
	438	0.029	0.015	0.008	0.013	0.022
	439	0.03	0.016	0.009	0.014	0.023
	440	0.031	0.017	0.009	0.014	0.024
	441	0.031	0.018	0.01	0.015	0.025
	442	0.032	0.018	0.011	0.016	0.025
	443	0.033	0.019	0.012	0.017	0.026
	444	0.033	0.02	0.012	0.018	0.027
	445	0.034	0.02	0.013	0.018	0.028
	446	0.035	0.021	0.014	0.019	0.029
	447	0.036	0.022	0.015	0.02	0.03
	448	0.037	0.023	0.016	0.021	0.031
	449	0.038	0.024	0.017	0.022	0.032
	450	0.039	0.026	0.018	0.024	0.033
	451	0.04	0.027	0.019	0.025	0.035
	452	0.042	0.028	0.02	0.026	0.036
	453	0.043	0.03	0.022	0.028	0.038
	454	0.045	0.031	0.023	0.03	0.039
	455	0.047	0.033	0.025	0.032	0.041
	456	0.049	0.035	0.027	0.034	0.043
	457	0.051	0.037	0.029	0.036	0.046
	458	0.053	0.04	0.032	0.039	0.048
	459	0.056	0.042	0.034	0.041	0.051
	460	0.058	0.045	0.037	0.044	0.054
	461	0.062	0.048	0.04	0.047	0.057
	462	0.065	0.051	0.043	0.051	0.06
	463	0.068	0.054	0.046	0.054	0.064
	464	0.072	0.058	0.049	0.058	0.068
	465	0.076	0.062	0.053	0.062	0.071
	466	0.079	0.065	0.056	0.066	0.075
	467	0.083	0.069	0.06	0.069	0.079
	468	0.086	0.072	0.063	0.073	0.082
	469	0.089	0.075	0.066	0.076	0.085
	470	0.092	0.078	0.068	0.079	0.088
	471	0.094	0.08	0.071	0.081	0.091
	472	0.097	0.083	0.073	0.084	0.094
	473	0.098	0.084	0.075	0.086	0.096
	474	0.1	0.086	0.077	0.088	0.097
	475	0.102	0.088	0.078	0.09	0.099
	476	0.104	0.09	0.08	0.091	0.101
	477	0.106	0.092	0.082	0.093	0.103
	478	0.108	0.094	0.084	0.096	0.106
	479	0.111	0.097	0.087	0.099	0.109
	480	0.115	0.1	0.09	0.102	0.112
	481	0.119	0.104	0.094	0.107	0.117
	482	0.124	0.109	0.099	0.112	0.122
	483	0.129	0.115	0.104	0.117	0.127
	484	0.136	0.121	0.11	0.124	0.134
	485	0.143	0.128	0.117	0.132	0.142
	486	0.152	0.137	0.125	0.141	0.151
	487	0.161	0.146	0.134	0.15	0.16
	488	0.17	0.155	0.143	0.16	0.17
	489	0.182	0.167	0.154	0.172	0.182
	490	0.194	0.179	0.166	0.185	0.195
	491	0.208	0.192	0.179	0.199	0.209
	492	0.223	0.208	0.194	0.215	0.225
	493	0.239	0.223	0.209	0.231	0.241
	494	0.256	0.24	0.225	0.248	0.259
	495	0.274	0.258	0.242	0.267	0.278
	496	0.292	0.276	0.26	0.286	0.297
	497	0.309	0.293	0.276	0.304	0.315
	498	0.324	0.308	0.29	0.32	0.33
	499	0.337	0.321	0.303	0.333	0.344
	500	0.346	0.33	0.312	0.343	0.353
	501	0.351	0.334	0.316	0.347	0.358
	502	0.35	0.333	0.315	0.347	0.357
	503	0.344	0.327	0.309	0.34	0.35
	504	0.333	0.316	0.298	0.328	0.338
	505	0.318	0.301	0.284	0.313	0.323
	506	0.299	0.281	0.265	0.292	0.302
	507	0.278	0.26	0.245	0.27	0.28
	508	0.257	0.239	0.224	0.248	0.258
	509	0.234	0.217	0.203	0.224	0.234
	510	0.211	0.194	0.181	0.201	0.21
	511	0.19	0.174	0.161	0.179	0.189
	512	0.172	0.156	0.143	0.16	0.169
	513	0.154	0.139	0.127	0.142	0.151
	514	0.138	0.123	0.112	0.125	0.135
	515	0.125	0.11	0.099	0.111	0.121
	516	0.112	0.098	0.087	0.099	0.108
	517	0.102	0.088	0.077	0.088	0.097
	518	0.093	0.08	0.069	0.079	0.088
	519	0.085	0.073	0.062	0.071	0.08
	520	0.079	0.066	0.056	0.064	0.074
	521	0.073	0.061	0.05	0.058	0.068
	522	0.069	0.057	0.046	0.054	0.063
	523	0.064	0.053	0.042	0.05	0.059
	524	0.061	0.05	0.039	0.046	0.056
	525	0.058	0.047	0.037	0.043	0.053
	526	0.056	0.045	0.034	0.041	0.051
	527	0.054	0.043	0.032	0.039	0.048
	528	0.052	0.041	0.03	0.037	0.047
	529	0.05	0.039	0.029	0.035	0.045
	530	0.049	0.038	0.027	0.033	0.043
	531	0.047	0.037	0.026	0.032	0.042
	532	0.046	0.035	0.025	0.031	0.041
	533	0.045	0.034	0.024	0.03	0.04
	534	0.044	0.033	0.023	0.029	0.039
	535	0.043	0.032	0.022	0.028	0.038
	536	0.042	0.031	0.021	0.027	0.037
	537	0.041	0.03	0.02	0.026	0.036
	538	0.04	0.029	0.019	0.025	0.035
	539	0.039	0.028	0.018	0.024	0.034
	540	0.038	0.028	0.017	0.023	0.033
	541	0.037	0.027	0.016	0.022	0.032
	542	0.036	0.026	0.016	0.021	0.032
	543	0.036	0.025	0.015	0.021	0.031
	544	0.035	0.024	0.014	0.02	0.03
	545	0.034	0.023	0.013	0.019	0.029
	546	0.033	0.022	0.012	0.018	0.028
	547	0.032	0.021	0.012	0.017	0.028
	548	0.031	0.021	0.011	0.016	0.027
	549	0.03	0.02	0.01	0.016	0.026
	550	0.03	0.019	0.009	0.015	0.025
	551	0.029	0.018	0.009	0.014	0.025
	552	0.028	0.017	0.008	0.013	0.024
	553	0.027	0.017	0.007	0.013	0.023
	554	0.027	0.016	0.006	0.012	0.022
	555	0.026	0.015	0.006	0.011	0.022
	556	0.025	0.014	0.005	0.01	0.021
	557	0.025	0.014	0.004	0.01	0.02
	558	0.024	0.013	0.004	0.009	0.02
	559	0.023	0.013	0.003	0.009	0.019
	560	0.023	0.012	0.003	0.008	0.019
	561	0.022	0.011	0.002	0.007	0.018
	562	0.022	0.011	0.001	0.007	0.018
	563	0.021	0.01	0.001	0.006	0.017
	564	0.021	0.01	0.001	0.006	0.017
	565	0.02	0.009	0	0.005	0.016
	566	0.02	0.009	0	0.005	0.016
	567	0.019	0.008	-0.001	0.005	0.015
	568	0.019	0.008	-0.001	0.004	0.015
	569	0.018	0.008	-0.001	0.004	0.015
	570	0.018	0.007	-0.002	0.003	0.014
	571	0.018	0.007	-0.002	0.003	0.014
	572	0.017	0.006	-0.002	0.003	0.014
	573	0.017	0.006	-0.003	0.002	0.013
	574	0.017	0.006	-0.003	0.002	0.013
	575	0.016	0.006	-0.003	0.002	0.013
	576	0.016	0.005	-0.004	0.002	0.013
	577	0.016	0.005	-0.004	0.001	0.012
	578	0.016	0.005	-0.004	0.001	0.012
	579	0.015	0.004	-0.004	0.001	0.012
	580	0.015	0.004	-0.005	0.001	0.012
	581	0.015	0.004	-0.005	0.001	0.011
	582	0.015	0.004	-0.005	0	0.011
	583	0.015	0.004	-0.005	0	0.011
	584	0.015	0.004	-0.005	0	0.011
	585	0.014	0.003	-0.005	0	0.011
	586	0.014	0.003	-0.005	0	0.011
	587	0.014	0.003	-0.005	0	0.011
	588	0.014	0.003	-0.006	-0.001	0.01
	589	0.014	0.003	-0.006	-0.001	0.01
	590	0.014	0.003	-0.006	-0.001	0.01
	591	0.014	0.003	-0.006	-0.001	0.01
	592	0.013	0.003	-0.006	-0.001	0.01
	593	0.013	0.003	-0.006	-0.001	0.01
	594	0.013	0.003	-0.006	-0.001	0.01
	595	0.013	0.002	-0.006	-0.001	0.01
	596	0.013	0.002	-0.006	-0.001	0.01
	597	0.013	0.002	-0.006	-0.001	0.01
	598	0.013	0.002	-0.006	-0.001	0.01
	599	0.013	0.002	-0.006	-0.002	0.01
	600	0.013	0.002	-0.006	-0.002	0.01
	601	0.013	0.002	-0.006	-0.002	0.009
	602	0.013	0.002	-0.006	-0.002	0.01
	603	0.013	0.002	-0.006	-0.002	0.01
	604	0.013	0.002	-0.007	-0.002	0.01
	605	0.013	0.002	-0.006	-0.002	0.009
	606	0.013	0.002	-0.007	-0.002	0.009
	607	0.013	0.002	-0.007	-0.002	0.009
	608	0.013	0.002	-0.007	-0.002	0.009
	609	0.013	0.002	-0.007	-0.002	0.009
	610	0.012	0.002	-0.007	-0.002	0.009
	611	0.012	0.002	-0.007	-0.002	0.009
	612	0.012	0.002	-0.007	-0.002	0.009
	613	0.012	0.002	-0.007	-0.002	0.009
	614	0.012	0.002	-0.007	-0.002	0.009
	615	0.012	0.002	-0.007	-0.002	0.009
	616	0.012	0.002	-0.007	-0.002	0.009
	617	0.012	0.002	-0.007	-0.002	0.009
	618	0.012	0.002	-0.007	-0.002	0.009
	619	0.012	0.002	-0.007	-0.002	0.009
	620	0.012	0.002	-0.007	-0.002	0.009
	621	0.012	0.002	-0.007	-0.002	0.009
	622	0.012	0.002	-0.007	-0.002	0.009
	623	0.012	0.002	-0.007	-0.002	0.009
	624	0.012	0.002	-0.007	-0.002	0.009
	625	0.012	0.002	-0.007	-0.002	0.009
	626	0.012	0.002	-0.007	-0.002	0.01
	627	0.012	0.002	-0.007	-0.002	0.009
	628	0.012	0.002	-0.007	-0.002	0.009
	629	0.012	0.002	-0.007	-0.002	0.009
	630	0.012	0.002	-0.007	-0.002	0.009
	631	0.012	0.002	-0.007	-0.002	0.009
	632	0.012	0.002	-0.007	-0.002	0.009
	633	0.012	0.002	-0.007	-0.002	0.01
	634	0.012	0.002	-0.007	-0.002	0.01
	635	0.012	0.001	-0.007	-0.002	0.009
	636	0.012	0.002	-0.007	-0.002	0.009
	637	0.012	0.002	-0.007	-0.002	0.009
	638	0.012	0.002	-0.007	-0.002	0.009
	639	0.012	0.001	-0.007	-0.002	0.009
	640	0.012	0.001	-0.007	-0.002	0.009
	641	0.012	0.001	-0.007	-0.002	0.009
	642	0.012	0.001	-0.007	-0.002	0.009
	643	0.012	0.002	-0.007	-0.002	0.009
	644	0.012	0.001	-0.007	-0.002	0.009
	645	0.012	0.001	-0.007	-0.002	0.009
	646	0.012	0.001	-0.007	-0.002	0.009
	647	0.012	0.002	-0.007	-0.002	0.009
	648	0.012	0.001	-0.007	-0.002	0.009
	649	0.012	0.001	-0.007	-0.002	0.009
	650	0.012	0.001	-0.007	-0.002	0.009
	651	0.012	0.001	-0.007	-0.003	0.009
	652	0.012	0.001	-0.007	-0.002	0.009
	653	0.012	0.002	-0.007	-0.002	0.009
	654	0.012	0.002	-0.007	-0.002	0.009
	655	0.012	0.001	-0.007	-0.002	0.009
	656	0.012	0.001	-0.007	-0.002	0.009
	657	0.012	0.001	-0.007	-0.002	0.009
	658	0.012	0.001	-0.007	-0.002	0.009
	659	0.012	0.001	-0.007	-0.003	0.009
	660	0.012	0.002	-0.007	-0.002	0.009
	661	0.012	0.001	-0.007	-0.002	0.009
	662	0.012	0.001	-0.007	-0.002	0.009
	663	0.011	0.001	-0.007	-0.002	0.009
	664	0.012	0.001	-0.007	-0.002	0.009
	665	0.012	0.001	-0.007	-0.002	0.009
	666	0.011	0.001	-0.007	-0.003	0.009
	667	0.011	0.001	-0.007	-0.003	0.009
	668	0.011	0.001	-0.007	-0.002	0.009
	669	0.012	0.001	-0.007	-0.002	0.009
	670	0.012	0.001	-0.007	-0.002	0.009
	671	0.011	0.001	-0.007	-0.002	0.009
	672	0.011	0.001	-0.007	-0.002	0.009
	673	0.011	0.001	-0.007	-0.002	0.009
	674	0.011	0.001	-0.007	-0.002	0.009
	675	0.011	0.001	-0.007	-0.003	0.009
	676	0.011	0.001	-0.007	-0.002	0.009
	677	0.011	0.001	-0.007	-0.002	0.009
	678	0.011	0.001	-0.007	-0.002	0.01
	679	0.011	0.001	-0.007	-0.002	0.009
	680	0.011	0.001	-0.007	-0.002	0.009
	681	0.011	0.001	-0.007	-0.002	0.01
	682	0.011	0.001	-0.007	-0.003	0.01
	683	0.011	0.001	-0.007	-0.002	0.01
	684	0.011	0.001	-0.007	-0.003	0.01
	685	0.011	0.001	-0.007	-0.002	0.01
	686	0.011	0.001	-0.007	-0.003	0.01
	687	0.011	0.001	-0.007	-0.003	0.01
	688	0.011	0.001	-0.007	-0.003	0.01
	689	0.011	0.001	-0.007	-0.002	0.01
	690	0.011	0.001	-0.007	-0.003	0.01
	691	0.011	0.001	-0.007	-0.003	0.01
	692	0.011	0.001	-0.007	-0.002	0.01
	693	0.011	0.001	-0.007	-0.002	0.01
	694	0.011	0.001	-0.007	-0.003	0.01
	695	0.011	0.001	-0.007	-0.003	0.01
	696	0.011	0.001	-0.007	-0.003	0.01
	697	0.011	0.001	-0.007	-0.003	0.01
	698	0.011	0.001	-0.007	-0.003	0.01
	699	0.011	0.001	-0.007	-0.003	0.01
	700	0.011	0.001	-0.007	-0.003	0.01
	701	0.011	0.001	-0.007	-0.003	0.01
	702	0.011	0.001	-0.007	-0.003	0.01
	703	0.011	0.001	-0.007	-0.003	0.01
	704	0.011	0.001	-0.007	-0.003	0.01
	705	0.011	0.001	-0.007	-0.003	0.01
	706	0.011	0.001	-0.007	-0.003	0.01
	707	0.011	0.001	-0.007	-0.003	0.01
	708	0.011	0.001	-0.007	-0.003	0.01
	709	0.011	0.001	-0.007	-0.003	0.01
	710	0.011	0.001	-0.007	-0.003	0.01
	711	0.01	0.001	-0.007	-0.003	0.01
	712	0.01	0.001	-0.007	-0.003	0.01
	713	0.01	0.001	-0.007	-0.003	0.01
	714	0.01	0.001	-0.007	-0.003	0.01
	715	0.01	0.001	-0.007	-0.003	0.01
	716	0.01	0.001	-0.007	-0.003	0.01
	717	0.01	0.001	-0.007	-0.003	0.01
	718	0.01	0.001	-0.007	-0.003	0.01
	719	0.01	0.001	-0.007	-0.003	0.01
	720	0.01	0.001	-0.007	-0.003	0.01
	721	0.01	0.001	-0.006	-0.003	0.01
	722	0.01	0.001	-0.006	-0.003	0.01
	723	0.01	0.001	-0.006	-0.003	0.01
	724	0.01	0.001	-0.006	-0.003	0.01
	725	0.01	0.001	-0.006	-0.003	0.01
	726	0.01	0.001	-0.006	-0.003	0.01
	727	0.01	0.001	-0.006	-0.003	0.01
	728	0.01	0.001	-0.006	-0.003	0.01
	729	0.01	0.001	-0.006	-0.003	0.01
	730	0.01	0.001	-0.006	-0.003	0.01
	731	0.01	0.001	-0.006	-0.003	0.01
	732	0.01	0.001	-0.006	-0.003	0.01
	733	0.01	0.001	-0.006	-0.003	0.01
	734	0.01	0.001	-0.006	-0.003	0.01
	735	0.01	0.001	-0.006	-0.003	0.01
	736	0.01	0.001	-0.006	-0.003	0.01
	737	0.01	0.001	-0.006	-0.003	0.01
	738	0.01	0.001	-0.006	-0.003	0.01
	739	0.01	0.001	-0.006	-0.003	0.01
	740	0.01	0.001	-0.006	-0.003	0.01
	741	0.01	0.001	-0.006	-0.003	0.01
	742	0.01	0.001	-0.006	-0.003	0.01
	743	0.01	0.001	-0.006	-0.003	0.01
	744	0.01	0.001	-0.006	-0.003	0.01
	745	0.01	0.001	-0.006	-0.003	0.01
	746	0.01	0.001	-0.006	-0.003	0.01
	747	0.01	0.001	-0.006	-0.003	0.01
	748	0.01	0.001	-0.006	-0.003	0.01
	749	0.01	0.001	-0.006	-0.003	0.01
	750	0.01	0.001	-0.006	-0.003	0.01
	751	0.01	0.001	-0.006	-0.004	0.01
	752	0.01	0.001	-0.006	-0.003	0.01
	753	0.01	0.001	-0.006	-0.004	0.01
	754	0.01	0.001	-0.006	-0.004	0.01
	755	0.01	0.001	-0.006	-0.004	0.01
	756	0.01	0.001	-0.006	-0.004	0.01
	757	0.01	0.001	-0.006	-0.004	0.01
	758	0.009	0.001	-0.006	-0.004	0.01
	759	0.009	0.001	-0.006	-0.004	0.01
	760	0.009	0.001	-0.006	-0.004	0.01
	761	0.009	0.001	-0.006	-0.004	0.01
	762	0.009	0.001	-0.006	-0.004	0.01
	763	0.009	0.001	-0.006	-0.004	0.01
	764	0.009	0.001	-0.006	-0.004	0.01
	765	0.009	0.001	-0.006	-0.004	0.01
	766	0.009	0.001	-0.006	-0.004	0.01
	767	0.009	0.001	-0.006	-0.004	0.01
	768	0.009	0.001	-0.006	-0.004	0.01
	769	0.009	0.001	-0.006	-0.004	0.01
	770	0.009	0.001	-0.006	-0.004	0.01
	771	0.009	0.001	-0.006	-0.004	0.01
	772	0.009	0.001	-0.006	-0.004	0.01
	773	0.009	0.001	-0.006	-0.004	0.01
	774	0.009	0.001	-0.006	-0.004	0.01
	775	0.009	0.001	-0.006	-0.004	0.01
	776	0.009	0.001	-0.006	-0.004	0.01
	777	0.009	0.001	-0.006	-0.004	0.009
	778	0.009	0.001	-0.006	-0.004	0.01
	779	0.009	0.001	-0.006	-0.004	0.01
	780	0.009	0.001	-0.006	-0.004	0.01
	781	0.009	0.001	-0.006	-0.004	0.01
	782	0.009	0.001	-0.006	-0.004	0.01
	783	0.009	0.001	-0.006	-0.004	0.01
	784	0.009	0.001	-0.006	-0.004	0.01
	785	0.008	0.001	-0.006	-0.004	0.01
	786	0.008	0.001	-0.006	-0.004	0.009
	787	0.009	0.001	-0.006	-0.004	0.009
	788	0.008	0.001	-0.006	-0.004	0.009
	789	0.008	0.001	-0.006	-0.004	0.009
	790	0.008	0.001	-0.006	-0.004	0.009
	791	0.008	0.001	-0.006	-0.004	0.009
	792	0.008	0.001	-0.006	-0.004	0.009
	793	0.008	0.001	-0.006	-0.004	0.009
	794	0.008	0.001	-0.006	-0.004	0.009
	795	0.008	0.001	-0.006	-0.004	0.009
	796	0.008	0.001	-0.006	-0.004	0.009
	797	0.008	0.001	-0.006	-0.004	0.009
	798	0.008	0.001	-0.006	-0.004	0.009
	799	0.008	0.001	-0.006	-0.004	0.009
	800	0.008	0.001	-0.006	-0.004	0.009

## Sheet: Fig4A
	Spectrofluorimetric studies ds-ctDNA
	Wavenumber	Intensity
	nm	a.u.
	475	107510192	108046769	105305942	101146339	108535154	105123139	108892526
	476.06	78108159	78661999	76230524	72892835	79161754	76156769	79538751
	47695999	53100255	53651874	51529075	48926992	54144654	51543061	545252
	478.03	32486481	33016395	31201597	29248811	33483856	31282014	33851875
	47892999	16266837	16755562	15248088	13858291	17179358	15373629	17518774
	480	4441322	4869374	3668549	2755432	5231162	3817906	5525898
	48104001	-2716711	-2509476	-2769635	-2389622	-2365701	-2600726	-2249305
	481.94	-1193379	-1284031	-1087308	-953352	-1401072	-1158417	-1528407
	48298001	107138	1033733	959359	1057925	988722	10232	918815
	48401999	2324493	2378422	2207345	2155349	2266452	226037	236834
	48507001	2945784	2968359	2939359	2691178	2888878	2878161	3085504
	485.97	3436815	3433109	3422973	3122764	3409734	3427561	3683228
	48701001	4062927	4053802	4076562	3698911	4032625	4071067	4322075
	48804999	4884225	4876957	4868397	4536115	4853439	4943074	5143595
	48895001	5961415	5924296	5805214	565136	599275	6012003	6184557
	490	7423394	7266733	7064758	6972652	729033	7266171	7544472
	491.06	9116313	8937363	8587928	8564942	8919805	893961	9163452
	49195999	11276998	10996804	10602569	1067915	1078816	11035862	11151243
	493.03	13859638	1356772	12943481	13094309	13453888	13397279	13622599
	49392999	16881858	16120933	15691076	15902372	16402185	16228668	16877438
	495	2017908	19043688	18611818	18911852	19684403	19186221	20295181
	496.06	23013652	223715	21675534	2239849	2288288	22422785	23803049
	49695999	26215338	25874998	25468219	25869976	26042926	25503159	27369136
	498.03	29304461	29221394	28796726	29602016	2929024	28701873	30742715
	49892999	32160555	32640908	31956706	32960456	32601211	31939358	33581471
	500	3491968	35743521	34969358	35897952	35133378	34823552	36230569
	50104001	3752793	38520186	37379097	37986454	37520169	37319957	38361579
	501.94	39873753	40766594	39420547	39762644	39353831	3933014	4031663
	50298001	41548676	42363883	40612244	41130109	41048409	40991868	420.1
	50401999	42694722	43290088	41700271	4183722	41959053	42720091	43489966
	50507001	43130244	43706007	41942091	42189227	42559008	43339972	44097439
	505.97	42807087	43770718	41737291	41950974	42308697	43692291	44124874
	50701001	42046433	43111787	4149117	41245979	41753171	43016484	43728892
	50804999	41038553	42033241	4040154	4037194	41119598	42111869	42496366
	50895001	39753225	40805865	39270661	39057298	40381941	40916802	40872877
	510	38741924	39209179	38165596	37514971	38962682	38895575	39472327
	511.06	37315989	37611053	36593945	35634502	3752599	36769623	37750076
	51195999	35906199	35985453	35249867	34006596	35741806	34826914	36110591
	51303003	34290554	34474056	33921218	32559045	34059579	33068734	34381482
	51392999	32769849	33179403	32840466	31190795	32383111	31921536	32926391
	515	31239327	31738409	31355963	29987902	31013593	30440445	31554681
	516.06	29963421	30481474	29799749	28608501	29705534	29316667	30086871
	51696002	28217209	29062689	28269008	27638697	28522386	28105047	28800247
	51803003	27036871	27756629	2673475	26527319	27571476	27133646	2737495
	51892999	25803563	26489282	25377269	25481663	26541505	26119726	26314248
	520	247292	25231362	24329036	24506695	25496495	24837101	2542191
	52103998	23479156	24101532	23162259	23510034	24283572	23670489	24318837
	521.94	22806437	2314035	22314335	22414944	23196405	22486646	2338485
	52297998	22134941	222776	21549374	21489126	222192	21583492	2238753
	52402002	21515934	21381445	20776172	20676996	2112542	2098998	21655933
	52507001	20790637	20635482	20123034	19797701	20241204	20162059	21015298
	52596997	20050247	19824319	19326837	1900625	19410733	19460363	20306824
	52701001	19278115	19292772	18626506	18303632	18641737	18797313	19688283
	52804999	18583177	18802225	17804283	17496193	18114153	18261351	19022114
	52895001	1782306	18320452	17156426	16867406	17453553	17726388	18494866
	530	17090881	17788483	16696203	16409203	16981604	17052408	17711857
	53103998	16576167	17234959	16146236	15862375	16466007	16193985	17048298
	531.94	16074756	16709434	15506954	15383303	15928282	15496903	16399754
	53297998	15553255	16159835	14939545	14916987	15381668	15174785	1559923
	53402002	14959991	15521962	1443059	14353596	14703317	14722122	14933091
	53507001	14378999	14913027	13949131	13840719	14193626	13964056	14423416
	53596997	13742388	14200896	13399729	13243087	13748628	13243402	13917999
	53701001	13215932	137375	12866529	12621299	13209209	12507854	13367771
	53804999	12728723	13115242	12300796	12024172	12818694	12047084	12945754
	53895001	12366454	12525469	11921351	11560275	12324608	11642476	12585688
	540	11788269	11993772	1149452	11038795	1175974	11183857	12051841
	54103998	11342516	11490001	11084138	10615615	11251352	10792864	11585892
	541.94	10871818	1097968	10620288	10236139	10714909	10371727	11049628
	54297998	10384271	10547152	10128237	9799734	10201607	1006289	10549897
	54402002	9817753	10053962	9634513	9343631	9647714	9693771	10043494
	54507001	9399885	9554831	9132511	9002584	9222185	9108025	9569346
	54596997	8899796	9048205	874003	8522866	8783119	8569043	9052468
	54701001	829386	8527008	8304509	8134641	8300357	8061472	8662093
	54804999	7889248	8083012	7966061	7689441	7986703	7731249	8217109
	54895001	7581716	7720767	7568436	7226651	762931	7360026	782705
	550	716019	7306525	7171861	6794294	7249497	6941222	7367021
	55103998	6915538	6850327	6767272	6515564	6865108	6556259	6919233
	551.94	6549167	6444596	6366051	619032	662953	6187662	6495847
	55297998	6259658	6140182	5934773	5898045	627684	5883149	6032513
	55402002	5942821	57949	5631718	5591043	5904681	5546479	5628934
	55507001	5760348	5543921	537507	5352059	5559883	5252524	5367265
	55596997	5462286	5291839	5172143	4998552	5240138	5016686	5187622
	55701001	5048548	5059888	4912397	4763922	497149	4680642	5056342
	55804999	4857396	4907311	468498	4475576	470137	4501242	4822283
	55895001	4668695	4705453	4459138	4196235	4414778	429713	4595046
	560	4412593	4453146	4241927	4044768	4212694	4041291	4335109
	56102002	4142765	418367	3903513	3881226	3973534	3848108	4114937
	56204999	3920395	3988128	3715904	3685337	3819273	3700422	3897354
	562.94	3811526	3801416	3537684	3546906	3638547	3475528	3590603
	56396997	3590472	3582523	3389792	3395069	3463492	3297103	3382344
	565	3365952	3449136	3225318	3230515	3332685	3128083	3199826
	56602002	316387	3242169	302056	2998286	3176781	2988144	3023766
	56704999	3012548	3164122	2874778	2853145	3001892	2803854	2880121
	567.94	2918791	3009996	2764333	2668252	2808684	2683822	2737865
	56896997	2753351	2843226	2650883	2547635	2675441	2612413	2610442
	570	2577698	266755	2546952	2451836	2566343	2444341	2503151
	57103998	2449715	2565906	244902	2323993	2398752	230885	2376099
	571.94	2382009	2411967	2432093	2234481	2255118	2206223	2272453
	57297998	226103	2298109	2299041	2138723	2176507	2115271	2113066
	57402002	2121315	2189318	2164465	2044808	2097406	2007751	202553
	57507001	1992728	2092269	2072615	1922244	2041957	1868411	1949182
	57596997	1913831	1992043	1961026	1805949	1937237	1771148	1869145
	57701001	1836986	1928132	183995	1747902	1816224	1702391	1840982
	57804999	1728294	1804077	1735546	1643516	1705863	1621947	174299
	57895001	1630843	168566	1634866	1574408	1659205	1564466	1701601
	580	1589691	1595157	1539379	1477876	1602764	1498713	1638763
	58102002	1539833	1526315	1454576	1423885	1497813	1423705	1595919
	58204999	1475025	1432909	1368369	1373959	1418148	140668	1511947
	582.94	1386052	1366544	1264262	1319759	1355423	1376899	1433031
	58396997	1320841	1283856	1181036	1277022	1298637	1269357	1399672
	585	1274139	1221558	1149407	1211289	1239062	1203882	1355777
	58602002	119838	120436	1093347	1207022	1124475	1142108	1289568
	58704999	1140928	1170046	1089436	1189902	1053151	109358	124242
	587.94	1118015	1136838	1106956	1106593	1021095	1022955	1139793
	58896997	1083953	1105847	1076373	1076902	1022853	9859	1101591
	590	1084161	1068218	1041514	1035864	1007086	963484	1059983
	59102002	1062864	1026737	997315	989758	969443	930188	1052678
	59204999	1028299	951083	948409	906619	943599	914544	1000187
	592.94	944636	890091	881428	883284	904513	856056	958824
	59396997	898485	837486	820843	856171	881855	820165	939889
	595	850475	809754	774322	822922	861227	791385	905846
	59602002	808546	770774	736894	787261	827404	761857	873418
	59704999	769733	736211	708505	752685	790452	733146	837975
	597.94	734035	706066	689153	719193	750372	705254	799516
	59896997	701453	680337	678839	686784	707163	678179	758042
	600	671986	659026	677564	65546	660825	651922	713552

## Sheet: Fig4B
	Spectrofluorimetric studies ss-ctDNA
	Wavenumber	Intensity
	nm	a.u.
	475	103059236	100123655	96163585	98518954	100863183	101365859
	476.06	74306211	72015268	68690903	70753041	72589427	72992066
	47695999	49911211	48186797	45459945	47231343	48615435	4893221
	478.03	29874237	28638242	2647071	2795386	28941208	29186292
	47892999	14195289	13369602	11723198	12920593	13566745	1375431
	480	2874366	2380879	121741	2131541	2492046	2636266
	48104001	-2816637	-2426007	-2204943	-2155651	-2532218	-2528956
	481.94	-99877	-1029679	-68089	-718156	-1131754	-911902
	48298001	1000464	1007507	1120373	1205802	93131	1082985
	48401999	216472	2084199	2157203	2152341	20357	2195136
	48507001	2779959	2688331	2744461	2730618	2699949	2813762
	485.97	325628	3217837	3154443	3189338	3230085	3326264
	48701001	3746968	3820305	3788025	3905915	3896827	3914177
	48804999	4573111	4609601	457686	4647945	4741561	4718611
	48895001	5588964	5737805	5576015	5757201	5705734	586574
	490	6906936	7192066	6907684	6851396	692367	7249519
	491.06	8272079	891152	8415767	8320976	8342436	8773099
	49195999	10120928	10888794	10208373	10300021	10175399	10834374
	493.03	12435485	13205541	12546724	12503768	12326811	13099093
	49392999	15216162	15890201	15462746	15227236	15028918	15666477
	495	18119897	18751194	18400778	18364901	18027612	18605698
	496.06	21147069	21858573	21715889	21625368	21160215	21660326
	49695999	24407745	25172537	25154701	25124186	24515543	24914146
	498.03	27742833	28117401	28232954	28294124	27893009	28304766
	49892999	30850975	31099468	31091371	31514811	31442868	31387511
	500	33620877	33834219	33829724	34562436	34662965	34141841
	50104001	35394228	36045737	36312591	37115047	37139306	3640784
	501.94	37260727	37808089	38264358	38978453	39299868	3870603
	50298001	38807784	39371781	398336	40328887	410126	40353817
	50401999	39792815	40464486	40859633	41262182	42077173	41561009
	50507001	39891393	4079654	41253639	4155157	41972876	42284024
	505.97	39679858	40898328	41243455	41553503	41320977	42088557
	50701001	39137431	40119329	40473101	41183339	40285188	41774887
	50804999	37958674	39161423	3895721	40259345	38967695	40930416
	50895001	36708096	38039391	37429296	39165721	37785588	39198826
	510	3512732	36487377	35978209	38130171	3620941	37790886
	511.06	33190441	34842182	34734384	36387667	34416547	36217768
	51195999	31706469	33164901	33036516	34549393	33103991	3488514
	51303003	30174626	31892741	31570021	32940687	3178871	3347985
	51392999	2867564	3047062	30221241	31411163	30250016	32149409
	515	27226713	29097085	29121987	30088745	28736505	30642673
	516.06	26222712	27865747	27964866	28917141	27534058	29036411
	51696002	25185539	26478214	26718147	27643288	26384822	27768405
	51803003	24116774	2566587	25514338	26402274	25277562	26390051
	51892999	23472277	24855553	24531637	25198355	24505901	25069748
	520	22708284	23829882	23465577	23951529	2364761	24205726
	52103998	21764597	22871057	22524521	22810639	22749851	23275357
	521.94	20885892	21731684	21284108	21822079	21945244	22514998
	52297998	1993066	21005199	20576718	21076877	2111308	21708922
	52402002	19009584	20200092	1991233	2053118	20274131	20980266
	52507001	18256109	19629981	19372759	1999776	19521004	20122553
	52596997	1755959	18950406	1887077	19344512	1868152	19194539
	52701001	16808855	18251629	18169009	18813425	17837644	18483657
	52804999	16192671	17573272	17590455	18360665	1707618	17805846
	52895001	15671111	17154392	16996421	1761499	16595074	17326002
	530	15190229	16314751	16293699	1693754	15920995	1673178
	53103998	14642093	1551417	15505749	16277178	15251212	16229349
	531.94	14076991	14699382	14780663	15508429	14722019	15661751
	53297998	13441987	14161521	14372991	14925594	14360428	14965797
	53402002	12891932	13600031	13882712	1430306	13923253	14440628
	53507001	12491542	13165461	1337216	13723919	13418864	13830206
	53596997	12114256	12700023	12915851	1330797	13021774	13189673
	53701001	11789803	12257069	12334909	12895531	12468655	12786852
	53804999	11465373	1181375	1189788	12554745	12004808	12329863
	53895001	11092789	11305149	11498484	11996632	1154114	11933683
	540	10850869	10705669	10998181	11677502	10943692	11422252
	54103998	10372327	1024018	10415476	11081334	10413303	10925199
	541.94	9763864	9778582	10048022	10571213	9945158	10451991
	54297998	9208074	9421654	9626151	10159798	955362	9893125
	54402002	8632542	8987913	908693	958359	9099563	946995
	54507001	805691	8662897	8573375	9094365	8630537	9122951
	54596997	7556858	8268352	8189379	8728729	8277983	8624685
	54701001	7130785	7950049	774157	8216585	7799353	8208675
	54804999	675255	7487305	7451649	7767006	7382362	7783739
	54895001	650954	7084563	711906	732115	7034244	7342387
	550	6301793	675477	6750943	6973238	6700094	6917755
	55103998	5985628	644542	6377383	6557168	6330936	6562725
	551.94	581713	608755	6123456	6265311	6052989	6291403
	55297998	5627338	5830448	5774536	6005791	5799168	5914754
	55402002	533151	5532002	5473614	5715424	5453024	5619742
	55507001	5032968	5298727	5250369	5501934	5177707	5389308
	55596997	4759043	4975199	4968726	5281347	4926034	5102227
	55701001	4481608	4728827	4693654	4933873	4702923	4897144
	55804999	4254264	4451659	4445392	4656042	4434402	4639801
	55895001	4064676	4183876	4124166	445676	4269225	4421854
	560	3831826	3932336	382334	4233519	405089	4206894
	56102002	3603931	3702036	3606889	4035672	383445	4003304
	56204999	3466223	3499464	3458012	387932	362203	382793
	562.94	3262103	333553	3271677	3751107	3373783	3618246
	56396997	3050301	3178507	3174182	3581358	3179174	3408569
	565	291142	3074136	3034166	3368854	3014592	3195306
	56602002	2794195	2954494	2877631	3159674	2882902	30298
	56704999	2649073	2804665	2757047	2958291	2775142	284991
	567.94	2525614	2652655	2610153	2813665	2612196	2664565
	56896997	2469053	2497932	244381	2637172	2523443	2542874
	570	2331018	2372002	2279015	2508141	2411881	2418608
	57103998	2200757	2253808	2185207	2369358	2301217	2338556
	571.94	2078274	2131076	2100387	2277189	2140988	2251417
	57297998	1969493	2025446	1976235	2176023	2051072	2141834
	57402002	1856028	1929443	1883566	2062966	1945932	2046678
	57507001	1774772	1882157	1755678	1927932	187909	1921906
	57596997	169357	1799242	166004	1793247	1811491	1798885
	57701001	1606805	1709503	1592689	1657796	1764715	172492
	57804999	1507891	1611456	1529522	1569218	1686153	1648844
	57895001	1426673	1550829	1464265	1467739	1613453	1583769
	580	1321208	14708	137612	1411542	1517952	1516955
	58102002	1236816	1388324	1324347	1355122	1407641	1458574
	58204999	1188092	1306711	1298396	1351591	1341929	1385853
	582.94	1182353	1271744	1245192	1320125	1291619	1332853
	58396997	1175072	119997	1171413	132119	1217095	1268215
	585	1160579	1156401	1119104	1294511	1175976	1165309
	58602002	1142997	1105867	107458	1251949	1159688	1077841
	58704999	1103081	105504	1037099	1206599	1136829	1041291
	587.94	1073216	978771	983437	1158727	1101841	1014269
	58896997	1026544	926403	96993	1055701	1036928	987444
	590	985298	880509	929527	99781	955162	967065
	59102002	919457	837421	903405	946829	900304	917551
	59204999	871317	811753	866908	861376	871795	869828
	592.94	834446	8046	828815	805093	831026	84972
	59396997	814559	80354	754005	768505	78517	82548
	595	772203	817642	746872	744559	733722	802278
	59602002	728561	792026	715609	719845	69872	769854
	59704999	683462	75538	684913	702649	669889	73846
	597.94	636906	707704	654783	692969	647227	708098
	59896997	588895	6.49	62522	690806	630735	678766
	600	539427	579266	596223	696161	620414	650464

## Sheet: Fig5
	CSPE		CSPE/ds-ctDNA		CSPE/ss-ctDNA
	E / V	i /uA	E / V	i /uA	E / V	i /uA
	-0.2573	0.2986	-0.16254	-0.0922	-0.2573	0.5885
	-0.2531	0.2915	-0.15834	-0.09392	-0.2531	0.5576
	-0.249	0.2859	-0.15424	-0.09168	-0.249	0.5752
	-0.2449	0.2711	-0.15014	-0.09432	-0.2449	0.5648
	-0.2408	0.2713	-0.14604	-0.08322	-0.2408	0.5555
	-0.2367	0.259	-0.14194	-0.06847	-0.2367	0.5368
	-0.2325	0.2488	-0.13774	-0.0592	-0.2325	0.508
	-0.2284	0.2362	-0.13364	-0.05055	-0.2284	0.4896
	-0.2243	0.2163	-0.12954	-0.05105	-0.2243	0.4532
	-0.2202	0.1997	-0.12544	-0.01738	-0.2202	0.4297
	-0.2161	0.1816	-0.12134	0.00592	-0.2161	0.3954
	-0.2119	0.1619	-0.11714	0.03167	-0.2119	0.3614
	-0.2078	0.1411	-0.11304	0.05985	-0.2078	0.318
	-0.2037	0.1251	-0.10894	0.09231	-0.2037	0.2905
	-0.1996	0.1079	-0.10484	0.1168	-0.1996	0.2586
	-0.1955	0.0904	-0.10074	0.1645	-0.1955	0.2189
	-0.1913	0.07473	-0.09654	0.2049	-0.1913	0.1898
	-0.1872	0.05997	-0.09244	0.2481	-0.1872	0.1573
	-0.1831	0.04644	-0.08834	0.304	-0.1831	0.124
	-0.179	0.00208	-0.08424	0.345	-0.179	0.1007
	-0.1749	0.02883	-0.08014	0.4022	-0.1749	0.07743
	-0.1707	0.02201	-0.07594	0.4637	-0.1707	0.05568
	-0.1666	0.00878	-0.07184	0.5297	-0.1666	0.03697
	-0.1625	0.00501	-0.06774	0.6226	-0.1625	0.02163
	-0.1584	0.00124	-0.06364	0.7231	-0.1584	0.01177
	-0.1543	-0.3953	-0.05954	0.8553	-0.1543	0.6984
	-0.1501	-0.00111	-0.05534	1012	-0.1501	0
	-0.146	0	-0.05124	1216	-0.146	-0.0065
	-0.1419	0.00111	-0.04714	1455	-0.1419	0.00196
	-0.1378	0.00467	-0.04304	1751	-0.1378	0.00248
	-0.1337	0.0067	-0.03894	2.12	-0.1337	0.01674
	-0.1295	0.01239	-0.03474	2541	-0.1295	0.03404
	-0.1254	0.01838	-0.03064	3045	-0.1254	0.03884
	-0.1213	0.02438	-0.02654	3.61	-0.1213	0.06255
	-0.1172	0.02885	-0.02244	4232	-0.1172	0.082
	-0.1131	-0.02558	-0.01834	4906	-0.1131	0.09778
	-0.1089	0.03962	-0.01414	5617	-0.1089	0.1175
	-0.1048	0.04501	-0.01004	6357	-0.1048	0.1455
	-0.1007	0.05741	-0.00594	7.11	-0.1007	0.168
	-0.09659	0.2499	-0.00183	7857	-0.09659	0.1991
	-0.09247	0.08619	0.00229	8571	-0.09247	0.238
	-0.08835	0.1071	0.00641	9229	-0.08835	0.2569
	-0.08423	0.1339	0.01053	9816	-0.08423	0.2949
	-0.08011	0.1646	0.01465	10.31	-0.08011	0.3305
	-0.07599	0.2112	0.01877	10.7	-0.07599	0.3759
	-0.07187	0.2642	0.02289	10.97	-0.07187	0.4106
	-0.06775	0.33	0.02701	11.14	-0.06775	0.4877
	-0.06363	0.4144	0.03113	11.21	-0.06363	0.5655
	-0.05951	0.5153	0.03525	11.16	-0.05951	0.6624
	-0.05539	0.6428	0.03937	11	-0.05539	0.7786
	-0.05127	0.7858	0.04349	10.68	-0.05127	0.9281
	-0.04715	0.956	0.04761	10.22	-0.04715	1103
	-0.04303	1141	0.05173	9578	-0.04303	1.32
	-0.03891	1359	0.05585	8773	-0.03891	1575
	-0.03479	1587	0.05997	7857	-0.03479	1862
	-0.03067	1.83	0.06409	6867	-0.03067	2191
	-0.02655	2081	0.06821	5884	-0.02655	2548
	-0.02243	2344	0.07233	4974	-0.02243	2936
	-0.01831	2601	0.07645	4186	-0.01831	3343
	-0.01419	2855	0.08057	3.51	-0.01419	3761
	-0.01007	3106	0.08469	2972	-0.01007	4.18
	-0.00595	3329	0.08881	2539	-0.00595	4598
	-0.00183	3537	0.09293	2193	-0.00183	5009
	0.00229	3.71	0.09705	1914	0.00229	5396
	0.00641	3847	0.10117	1686	0.00641	5754
	0.01053	3943	0.10529	1497	0.01053	6079
	0.01465	4001	0.10941	1332	0.01465	6342
	0.01877	4013	0.11353	1192	0.01877	6555
	0.02289	3984	0.11765	1071	0.02289	6701
	0.02701	3.92	0.12177	0.9586	0.02701	6.8
	0.03113	3818	0.12589	0.8684	0.03113	6828
	0.03525	3.68	0.13001	0.7858	0.03525	6804
	0.03937	3506	0.13413	0.7035	0.03937	6729
	0.04349	3295	0.13825	0.638	0.04349	6591
	0.04761	3049	0.14237	0.5786	0.04761	6408
	0.05173	2777	0.14649	0.521	0.05173	6156
	0.05585	2491	0.15061	0.4684	0.05585	5839
	0.05997	2201	0.15473	0.4166	0.05997	5455
	0.06409	1926	0.15885	0.3666	0.06409	5011
	0.06821	1.67	0.16297	0.3188	0.06821	4524
	0.07233	1444	0.16709	0.2744	0.07233	4023
	0.07645	1246	0.17121	0.2333	0.07645	3527
	0.08057	1081	0.17533	0.1892	0.08057	3059
	0.08469	0.9419	0.17945	0.1444	0.08469	2641
	0.08881	0.8252	0.18357	0.1134	0.08881	2286
	0.09293	0.7305	0.18769	0.08114	0.09293	1979
	0.09705	0.6513	0.19181	0.05744	0.09705	1728
	0.1012	0.5835	0.19596	0.03131	0.1012	1522
	0.1053	0.5205	0.20006	0.01616	0.1053	1349
	0.1094	0.4725	0.20416	0.00772	0.1094	1211
	0.1135	0.4278	0.20826	0.00447	0.1135	1089
	0.1176	0.392	0.21236	0	0.1176	0.9901
	0.1218	0.3571	0.21656	0.00316	0.1218	0.9027
	0.1259	0.324	0.22066	0.01181	0.1259	0.8178
	0.13	0.2971	0.22476	0.02138	0.13	0.7512
	0.1341	0.2689	0.22886	0.0401	0.1341	0.6839
	0.1382	0.2508	0.23296	0.05089	0.1382	0.6332
	0.1424	0.2287	0.23716	0.07114	0.1424	0.5882
	0.1465	0.2063	0.24126	0.09139	0.1465	0.5411
	0.1506	0.1903	0.24536	0.1184	0.1506	0.4996
	0.1547	0.1685	0.24946	0.1484	0.1547	0.4662
	0.1588	0.1474	0.25356	0.1769	0.1588	0.431
	0.163	0.1299	0.25776	0.2105	0.163	0.3977
	0.1671	0.1102	0.26186	0.2467	0.1671	0.364
	0.1712	0.09365	0.26596	0.2873	0.1712	0.3361
	0.1753	0.07737	0.27006	0.332	0.1753	0.3062
	0.1794	0.062	0.27416	0.384	0.1794	0.2783
	0.1836	0.04755	0.27836	0.4253	0.1836	0.2474
	0.1877	0.03341	0.28246	0.4822	0.1877	0.2229
	0.1918	0.02231	0.28656	0.5299	0.1918	0.1923
	0.1959	0.01427	0.29066	0.5755	0.1959	0.172
	0.2	0.00684	0.29476	0.6241	0.2	0.1405
	0.2042	0.00368	0.29896	0.6581	0.2042	0.1194
	0.2083	0.00174	0.30306	0.6945	0.2083	0.1001
	0.2124	-0.1977	0.30716	0.7334	0.2124	0.07922
	0.2165	0	0.31126	0.7558	0.2165	0.06388
	0.2206	0.00417	0.31536	0.7858	0.2206	0.03968
	0.2248	0.01047	0.31956	0.8094	0.2248	0.03013
	0.2289	0.01829	0.32366	0.8366	0.2289	0.0215
	0.233	0.02887	0.32776	0.8636	0.233	0.00615
	0.2371	0.03914	0.33186	0.8869	0.2371	0.00118
	0.2412	0.05612	0.33596	0.9169	0.2412	-0.4342
	0.2454	0.07188	0.34016	0.9494	0.2454	-0.8274
	0.2495	0.09527	0.34426	0.9828	0.2495	0
	0.2536	0.1147	0.34836	1022	0.2536	0.00418
	0.2577	0.1454	0.35246	1057	0.2577	0.01203
	0.2618	0.1807	0.35656	1099	0.2618	0.0156
	0.266	0.2206	0.36076	1142	0.266	0.03017
	0.2701	0.262	0.36486	1178	0.2701	0.04473
	0.2742	0.3082	0.36896	1214	0.2742	0.05654
	0.2783	0.3631	0.37306	1243	0.2783	0.06988
	0.2824	0.4222	0.37716	1278	0.2824	0.08139
	0.2866	0.4889	0.38136	1304	0.2866	0.0993
	0.2907	0.566	0.38546	1336	0.2907	0.1148
	0.2948	0.6574	0.38956	1361	0.2948	0.1306
	0.2989	0.7596	0.39366	1384	0.2989	0.1463
	0.303	0.8748	0.39776	1411	0.303	0.1649
	0.3072	1017	0.40196	1.43	0.3072	0.1816
	0.3113	1.17	0.40606	1453	0.3113	0.2019
	0.3154	1335	0.41016	1472	0.3154	0.2226
	0.3195	1515	0.41426	1486	0.3195	0.2463
	0.3236	1692	0.41836	1509	0.3236	0.2679
	0.3278	1872	0.42256	1525	0.3278	0.2895
	0.3319	2056	0.42666	1538	0.3319	0.3129
	0.336	2236	0.43076	1.56	0.336	0.3399
	0.3401	2411	0.43486	1573	0.3401	0.3685
	0.3442	2591	0.43896	1594	0.3442	0.3953
	0.3484	2.77	0.44316	1615	0.3484	0.4227
	0.3525	2953	0.44726	1636	0.3525	0.455
	0.3566	3124	0.45136	1.65	0.3566	0.4854
	0.3607	3299	0.45546	1.67	0.3607	0.5283
	0.3648	3473	0.45956	1692	0.3648	0.5676
	0.369	3628	0.46376	1719	0.369	0.6118
	0.3731	3771	0.46786	1739	0.3731	0.6605
	0.3772	3885	0.47196	1766	0.3772	0.7089
	0.3813	3.98	0.47606	1787	0.3813	0.762
	0.3854	4053	0.48016	1813	0.3854	0.8174
	0.3896	4097	0.48436	1843	0.3896	0.8698
	0.3937	4123	0.48846	1872	0.3937	0.9262
	0.3978	4137	0.49256	1903	0.3978	0.9743
	0.4019	4126	0.49666	1938	0.4019	1028
	0.406	4103	0.50076	1967	0.406	1074
	0.4102	4066	0.50496	1998	0.4102	1122
	0.4143	4.02	0.50906	2034	0.4143	1166
	0.4184	3965	0.51316	2071	0.4184	1212
	0.4225	3904	0.51726	2106	0.4225	1254
	0.4266	3835	0.52136	2146	0.4266	1294
	0.4308	3767	0.52556	2181	0.4308	1.33
	0.4349	3694	0.52966	2219	0.4349	1359
	0.439	3624	0.53376	2251	0.439	1389
	0.4431	3545	0.53786	2291	0.4431	1417
	0.4472	3476	0.54196	2331	0.4472	1444
	0.4514	3406	0.54616	2365	0.4514	1463
	0.4555	3334	0.55026	2404	0.4555	1479
	0.4596	3268	0.55436	2438	0.4596	1491
	0.4637	3202	0.55846	2.47	0.4637	1502
	0.4678	3136	0.56256	2504	0.4678	1515
	0.472	3077	0.56676	2536	0.472	1.52
	0.4761	3014	0.57086	2566	0.4761	1531
	0.4802	2957	0.57496	2604	0.4802	1532
	0.4843	2904	0.57906	2637	0.4843	1531
	0.4884	2848	0.58316	2667	0.4884	1527
	0.4926	2799	0.58736	2703	0.4926	1526
	0.4967	2751	0.59146	2732	0.4967	1525
	0.5008	2707	0.59556	2767	0.5008	1528
	0.5049	2669	0.59966	2798	0.5049	1525
	0.509	2635	0.60376	2835	0.509	1521
	0.5132	2.6	0.60796	2867	0.5132	1525
	0.5173	2568	0.61206	2902	0.5173	1523
	0.5214	2536	0.61616	2.94	0.5214	1519
	0.5255	2.51	0.62026	2974	0.5255	1522
	0.5296	2484	0.62436	3023	0.5296	1.52
	0.5338	2461	0.62856	3.06	0.5338	1.52
	0.5379	2442	0.63266	3107	0.5379	1518
	0.542	2424	0.63676	3.15	0.542	1526
	0.5461	2406	0.64086	3195	0.5461	1.52
	0.5502	2393	0.64496	3244	0.5502	1528
	0.5544	2381	0.64916	3295	0.5544	1529
	0.5585	2372	0.65326	3351	0.5585	1533
	0.5626	2363	0.65736	3407	0.5626	1538
	0.5667	2351	0.66146	3.46	0.5667	1.54
	0.5708	2347	0.66556	3519	0.5708	1545
	0.575	2342	0.66976	3574	0.575	1548
	0.5791	2335	0.67386	3639	0.5791	1554
	0.5832	2334	0.67796	3704	0.5832	1563
	0.5873	2337	0.68206	3768	0.5873	1.57
	0.5914	2338	0.68616	3825	0.5914	1576
	0.5956	2339	0.69036	3.89	0.5956	1586
	0.5997	2337	0.69446	3951	0.5997	1599
	0.6038	2.34	0.69856	4018	0.6038	1.61
	0.6079	2346	0.70266	4084	0.6079	1627
	0.612	2352	0.70676	4.15	0.612	1641
	0.6161	2.36	0.71086	4222	0.6161	1656
	0.6203	2368	0.71506	4297	0.6203	1674
	0.6244	2379	0.71916	4375	0.6244	1692
	0.6285	2392	0.72326	4457	0.6285	1713
	0.6326	2403	0.72736	4539	0.6326	1733
	0.6367	2417	0.73146	4631	0.6367	1756
	0.6409	2433	0.73566	4722	0.6409	1779
	0.645	2.45	0.73976	4818	0.645	1809
	0.6491	2467	0.74386	4917	0.6491	1826
	0.6532	2485	0.74796	5022	0.6532	1854
	0.6573	2508	0.75206	5139	0.6573	1889
	0.6615	2536	0.75626	5249	0.6615	1922
	0.6656	2556	0.76036	5369	0.6656	1959
	0.6697	2583	0.76446	5498	0.6697	2001
	0.6738	2618	0.76856	5633	0.6738	2043
	0.6779	2645	0.77266	5781	0.6779	2.09
	0.6821	2681	0.77686	5928	0.6821	2133
	0.6862	2716	0.78096	6079	0.6862	2.18
	0.6903	2753	0.78506	6241	0.6903	2234
	0.6944	2791	0.78916	6407	0.6944	2288
	0.6985	2836	0.79326	6588	0.6985	2349
	0.7027	2.88	0.79746	6772	0.7027	2.41
	0.7068	2928	0.80156	6969	0.7068	2475
	0.7109	2981	0.80566	7168	0.7109	2537
	0.715	3.03	0.80976	7.38	0.715	2611
	0.7191	3078	0.81386	7598	0.7191	2692
	0.7233	3136	0.81806	7827	0.7233	2783
	0.7274	3189	0.82216	8048	0.7274	2863
	0.7315	3243	0.82626	8281	0.7315	2948
	0.7356	3304	0.83036	8.52	0.7356	3033
	0.7397	3359	0.83446	8747	0.7397	3131
	0.7439	3415	0.83866	8974	0.7439	3.23
	0.748	3471	0.84276	9198	0.748	3331
	0.7521	3532	0.84686	9409	0.7521	3433
	0.7562	3586	0.85096	9606	0.7562	3548
	0.7603	3647	0.85506	9799	0.7603	3673
	0.7645	3705	0.85926	9.98	0.7645	3797
	0.7686	3758	0.86336	10.15	0.7686	3925
	0.7727	3819	0.86746	10.31	0.7727	4061
	0.7768	3876	0.87156	10.44	0.7768	4199
	0.7809	3942	0.87566	10.58	0.7809	4.35
	0.7851	3996	0.87986	10.7	0.7851	4504
	0.7892	4063	0.88396	10.83	0.7892	4667
	0.7933	4126	0.88806	10.94	0.7933	4845
	0.7974	4193	0.89216	11.06	0.7974	5024
	0.8015	4262	0.89626	11.19	0.8015	5205
	0.8057	4332	0.90046	11.31	0.8057	5391
	0.8098	4.41	0.90456	11.44	0.8098	5585
	0.8139	4486	0.90866	11.59	0.8139	5.78
	0.818	4.57	0.91276	11.73	0.818	5977
	0.8221	4661	0.91686	11.88	0.8221	6186
	0.8263	4746	0.92106	12.04	0.8263	6383
	0.8304	4.84	0.92516	12.19	0.8304	6589
	0.8345	4.94	0.92926	12.36	0.8345	6802
	0.8386	5046	0.93336	12.51	0.8386	7011
	0.8427	5152	0.93746	12.67	0.8427	7208
	0.8469	5261	0.94166	12.84	0.8469	7.42
	0.851	5377	0.94576	13	0.851	7639
	0.8551	5498	0.94986	13.17	0.8551	7.86
	0.8592	5625	0.95396	13.35	0.8592	8076
	0.8633	5753	0.95806	13.51	0.8633	8303
	0.8675	5886	0.96226	13.68	0.8675	8531
	0.8716	6023	0.96636	13.85	0.8716	8771
	0.8757	6166	0.97046	14.03	0.8757	9026
	0.8798	6311	0.97456	14.2	0.8798	9299
	0.8839	6454	0.97866	14.4	0.8839	9.6
	0.8881	6606	0.98286	14.62	0.8881	9946
	0.8922	6752	0.98696	14.85	0.8922	10.31
	0.8963	6898	0.99106	15.1	0.8963	10.73

## Sheet: Fig8
	Electrode	i / uA	yEr±
	FLBH/CSPE	21.4	1.2
	Probe-SH/
	FLBH/CSPE	30.9	3
	CoV-2C
	/Probe-SH
	/FLBH/CSPE	62	5
	CoV-2NC
	/Probe-SH
	/FLBH/CSPE	30.3	2

## Sheet: Fig9A
	[CoV-2C]/ fM	i / uA	yEr±
	0	42.825	5.83363
	5	55.45	8.41457
	10	62.025	13.7886
	15	61.5	9.532
	25	80.55	17.0413
	45	120.5	0.004
	60	140.916	3.56012
	85	167	10.976
	100	200	0.05

[truncated: 1 more sheets: Fig9B]
